# Distinct bioenergetic features of human invariant natural killer T (iNKT) cells enable retained functions in nutrient-deprived states

1 **Priya Khurana<sup>1,2</sup>, Chakkapong Burudpakdee<sup>1</sup>, Stephan A. Grupp<sup>2,3</sup>, Ulf H. Beier<sup>2,4,5</sup>, David M.**  
2 **Barrett<sup>6</sup>, and Hamid Bassiri<sup>1,2\*</sup>**

3 <sup>1</sup>Division of Infectious Diseases, Department of Pediatrics, Children's Hospital of Philadelphia,  
4 Philadelphia, PA, USA

5 <sup>2</sup>Perelman School of Medicine, University of Pennsylvania, Philadelphia, PA, USA

6 <sup>3</sup>Cell and Therapy Transplant Section, Division of Oncology, Children's Hospital of Philadelphia,  
7 Philadelphia, PA, USA

8 <sup>4</sup>Division of Nephrology, Department of Pediatrics, Children's Hospital of Philadelphia,  
9 Philadelphia, PA, USA

10 <sup>5</sup>Janssen Research and Development, Spring House, PA, USA

11 <sup>6</sup>Tmunity Therapeutics, Philadelphia, PA, USA

12 **\*Correspondence:**

13 Hamid Bassiri

14 [bassiri@chop.edu](mailto:bassiri@chop.edu)

15 **Keywords: invariant natural killer T cells, human peripheral blood mononuclear cells,**  
16 **immunometabolism, fatty acid oxidation, glycolysis, cytokine production and cytotoxicity**

17

## 18 **ABSTRACT**

19 Invariant natural killer T (iNKT) cells comprise a unique subset of lymphocytes that are primed for  
20 activation and possess innate NK-like functional features. Currently, iNKT cell-based  
21 immunotherapies remain in early clinical stages, and little is known about the ability of these cells to  
22 survive and retain effector functions within the solid tumor microenvironment (TME) long-term. In  
23 conventional T cells (T<sub>CONV</sub>), cellular metabolism is linked to effector functions and their ability to  
24 adapt to the nutrient-poor TME. In contrast, the bioenergetic requirements of iNKT cells –  
25 particularly those of human iNKT cells – at baseline and upon stimulation are not well understood;  
26 neither is how these requirements affect cytokine production or anti-tumor effector functions. We  
27 find that unlike T<sub>CONV</sub>, human iNKT cells are not dependent upon glucose or glutamine for cytokine  
28 production and cytotoxicity upon stimulation with anti-CD3 and anti-CD28. Additionally,  
29 transcriptional profiling revealed that stimulated human iNKT cells are less glycolytic than T<sub>CONV</sub>  
30 and display higher expression of fatty acid oxidation (FAO) and adenosine monophosphate-activated  
31 protein kinase (AMPK) pathway genes. Furthermore, stimulated iNKT cells displayed higher  
32 mitochondrial mass and membrane potential relative to T<sub>CONV</sub>. Real-time Seahorse metabolic flux  
33 analysis revealed that stimulated human iNKT cells utilize fatty acids as substrates for oxidation  
34 more than stimulated T<sub>CONV</sub>. Together, our data suggest that human iNKT cells possess different  
35 bioenergetic requirements from T<sub>CONV</sub> and display a more memory-like metabolic program relative to  
36 effector T<sub>CONV</sub>. Importantly, iNKT cell-based immunotherapeutic strategies could co-opt such unique

37 features of iNKT cells to improve their efficacy and longevity of anti-tumor responses.

38

## 39 **INTRODUCTION**

40 Invariant natural killer T (iNKT) cells comprise a subset of innate-like T lymphocytes with TCR  
41 specificity for glycolipid antigens presented by the monomorphic, MHC I-like molecule CD1d  
42 (Bendelac et al., 2007). iNKT cells possess innate-like effector cell features, including rapid  
43 activation, cytokine secretion, and trafficking to tumor sites; as such, iNKT cells bridge innate and  
44 adaptive immune responses (Brennan et al., 2013; Matsuda et al., 2008). The presence of both  
45 circulating and intratumoral iNKT cells predicts more favorable tumor prognosis and survival in  
46 patients with several solid and liquid tumors (reviewed in Wolf et al., 2018), suggesting that these  
47 cells play central roles in cancer immunity. This notion is supported by a body of literature (reviewed  
48 in Altman et al., 2015) that demonstrate that iNKT cells engage in both direct anti-tumor cytotoxicity  
49 against CD1d-expressing tumors (Bassiri et al., 2014; Kawano et al., 1997) and modulate the activity  
50 of many other immune cells, including natural killer (NK) cells, CD8<sup>+</sup> T cells (Carnaud et al., 1999;  
51 Crowe et al., 2002; Iyoda et al., 2018; Metelitsa et al., 2001; Mise et al., 2016; Smyth et al., 2002),  
52 and myeloid cells (Kitamura et al., 1999; Mussai et al., 2012; Song et al., 2009).

53 Recently, iNKT cells have begun to be utilized as a platform for cellular immunotherapy, as either  
54 adoptively-transferred cells (Exley et al., 2017; Kunii et al., 2009; Yamasaki et al., 2011) or chimeric  
55 antigen receptor (CAR)-transduced effectors directed against tumor antigens in lymphoma and solid  
56 tumor models (Heczey et al., 2014; Rotolo et al., 2018). While the studies published to date have  
57 demonstrated some efficacy, these trials are in early clinical stages and very little is understood about  
58 the basic cellular properties of iNKT cells that govern their ability to adapt to the tumor  
59 microenvironment (TME). Thus, there is a great need to better understand the metabolic properties of  
60 these cells in order to better inform the design of iNKT cell-based solid tumor immunotherapies in  
61 the future, particularly those that challenge existing conventional T cell (T<sub>CONV</sub>)-based therapies.

62 In T<sub>CONV</sub>, cellular metabolism is tightly linked to effector functions. Upon TCR stimulation, T<sub>CONV</sub>  
63 undergo metabolic reprogramming as they differentiate from naïve to effector states, shifting from  
64 predominant use of oxidative phosphorylation (OXPHOS) to a preferential reliance on glycolysis and  
65 glutaminolysis to fuel substrate biogenesis and effector functions (Pearce et al., 2013). In the TME,  
66 the long-term functional capacity of T<sub>CONV</sub> is minimized as they compete with tumor cells and tumor-  
67 supporting myeloid cells for limited glucose and glutamine (Chang et al., 2015; Ho et al., 2015). In  
68 contrast, memory T cells, which predominantly utilize fatty acid oxidation (FAO), are more  
69 persistent within the TME (Buck et al., 2016; Scharping et al., 2016; Sukumar et al., 2013). In  
70 addition, regulatory T cells (T<sub>REG</sub>) rely on OXPHOS and FAO (Michalek et al., 2011), allowing them  
71 to maintain immunosuppressive functions within the TME. Given that the metabolic profiles of  
72 T<sub>CONV</sub> and other immune cells have been demonstrated to directly influence tumor progression, the  
73 use of therapies that modulate TME metabolism represent attractive treatment options for solid  
74 tumors.

75 In contrast to T<sub>CONV</sub>, however, little is known about iNKT cell metabolism and its link to key anti-  
76 tumor effector functions such as cytokine production and cytotoxicity. Unlike T<sub>CONV</sub>, iNKT cells do  
77 not have distinct differentiation states and exit the thymus primed for activation (D'Andrea et al.,  
78 2000); these functional differences may indicate a unique underlying metabolic phenotype. Indeed,  
79 murine iNKT cells have been demonstrated to depend predominantly on OXPHOS for survival  
80 (Kumar et al., 2019) and have also been shown to increase lipid biosynthesis upon activation, both *in*

81 *vitro* and within the TME (Fu et al., 2020). Together, these data suggest that murine iNKT cells may  
82 have different bioenergetic profiles from T<sub>CONV</sub>, which could have significant consequences for their  
83 survival and function within the TME. While these studies have begun to elucidate the metabolic  
84 profiles of murine iNKT cells, a metabolic characterization of human peripheral blood iNKT cells  
85 and how it is linked to anti-tumor effector functions relative to T<sub>CONV</sub> has not been determined  
86 previously.

87 In the present study, we sought to delineate the metabolic and functional properties of rested and  
88 stimulated human iNKT cells relative to T<sub>CONV</sub> under both normal and nutrient-deplete conditions.  
89 Using peripheral blood-derived iNKT cells and matched T<sub>CONV</sub> from healthy human donors, we  
90 demonstrate distinct bioenergetic requirements between iNKT cells and T<sub>CONV</sub> for cytokine  
91 production and cytotoxicity after TCR stimulation. Specifically, we demonstrate that iNKT cells  
92 maintain effector functions in glucose- and glutamine-depleted conditions, and furthermore, utilize  
93 FAO metabolism to a greater extent than do T<sub>CONV</sub>. Our findings not only unveil novel bioenergetic  
94 features of primary human iNKT cells, but also suggest that iNKT cells may possess enhanced  
95 adaptability and longevity within the TME. Importantly, these features could be co-opted in the  
96 design of future iNKT cell-based solid tumor immunotherapies.

97

## 98 **MATERIALS AND METHODS**

### 99 **Human Primary Immune Cell Purification**

100 Healthy, de-identified human donor peripheral mononuclear blood cells (PBMC) and conventional T  
101 cells (T<sub>CONV</sub>) were purchased from the University of Pennsylvania Human Immunology Core under  
102 an institutional review board-approved protocol. To obtain sufficient yields of invariant natural killer  
103 (iNKT) cells, PBMC were plated in AIM V media (Gibco) containing 500ng/mL alpha-  
104 galactosylceramide (Cayman Chemicals; KRN7000) and 50U/mL recombinant IL-2 (PeproTech); on  
105 day 3-4 of culture, cells were fed with 10ng/mL recombinant IL-15 (BioLegend) and 10U/mL IL-2.  
106 On days 7-8 of expansion, iNKT cells were FACS-sorted from expanded PBMC (Vα24<sup>+</sup> CD3<sup>+</sup> cells)  
107 on BD Aria II or Aria Fusion instruments housed at the University of Pennsylvania and the  
108 Children's Hospital of Philadelphia Flow Cytometry Core Facilities, respectively. In parallel, purified  
109 CD4<sup>+</sup> and CD8<sup>+</sup> T cells from matched donors were mixed at a 1:1 ratio to ensure equal composition  
110 of T<sub>CONV</sub> populations.

### 111 **Cell Culture and Stimulation of Purified Lymphocytes**

112 Purified iNKT and pooled T<sub>CONV</sub> (1:1 CD4<sup>+</sup>:CD8<sup>+</sup>) populations were subject to either “rest” (low  
113 dose 30U/mL IL-2 only) or stimulation using Dynabeads Human T-Expander CD3/28 (ThermoFisher  
114 Scientific) at 1 million cells/mL at a ratio of 2 beads per cell for 48 hours. For all studies of rested  
115 and stimulated cells under normal conditions (transcriptional profiling and flow-based dyes), cells  
116 were cultured in AIM V media containing 10% FBS and 1% L-glutamine. For glucose deprivation  
117 studies, cells were rested and stimulated in complete RPMI 1640 media (Gibco) containing 10%  
118 dialyzed FBS and 1% L-glutamine supplemented with either 10mM glucose, 1mM glucose, or  
119 0.1mM glucose (Corning). For glutamine deprivation studies, cells were plated in either complete  
120 RPMI media (containing 10% FBS and 1% L-glutamine at an approximate concentration of 4mM  
121 glutamine total), or glutamine-free RPMI (Gibco) containing 10% dialyzed FBS supplemented with  
122 10mM glucose. For inhibition of glucose metabolism, 2-deoxy-D-glucose (Sigma cat # D6134) was  
123 added to cells at concentrations of 2mM or 20mM for 48 hours.

124

## 125 **Flow Cytometry**

126 To sort iNKT cells, the following antibodies were used for staining: anti-V $\alpha$ 24-J $\alpha$ 18 (clone 6B11;  
127 BioLegend #342912), anti-CD3 (clone OKT3; BioLegend #317318). For staining of purified  
128 lymphocyte populations, cells were first stained with Zombie Aqua fixable live/dead exclusion dye  
129 per manufacturer's instructions (BioLegend cat #423101), followed by surface staining in FACS  
130 buffer containing 2.5% FBS. For intracellular staining, cells were fixed and permeabilized using the  
131 Becton Dickinson Cytofix/Cytoperm kit, according to manufacturer's instructions (BD Biosciences  
132 cat #554714) and stained with antibodies against granzyme B (clone QA16A02; BioLegend  
133 #372208) or mouse IgG1k isotype control (clone MOPC-21; BD Biosciences cat #556650), or Cpt1a  
134 (clone8F6AE9; Abcam cat# 171449) and rabbit IgG monoclonal isotype control (clone EPR25A;  
135 Abcam cat# 199091). Samples were run on a FACSVerser cytometer (BD Biosciences) and analyzed  
136 using FlowJo software (Tree Star Inc.).

## 137 **Mitochondrial Dye Staining**

138 Purified rested and stimulated human iNKT cells and T<sub>CONV</sub> were harvested at 48 hours for staining  
139 in either 200nM MitoTracker Green (Invitrogen cat #M7514) or 20nM tetramethylrhodamine, methyl  
140 ester (TMRM; Invitrogen cat #T668) in serum-free RPMI media for 45 minutes at 37°C per  
141 manufacturer's protocol.

## 142 **RNA Purification and Quantitative Real-Time PCR**

143 Total RNA was isolated from rested and stimulated iNKT cells and T<sub>CONV</sub> using miRNeasy Mini kit  
144 per manufacturer's protocol (Qiagen). RNA was either hybridized for NanoString transcriptional  
145 analysis or converted to cDNA for qPCR analysis. For gene expression analysis of *Ifng*, cDNA was  
146 synthesized from purified mRNA using High Capacity Reverse Transcriptase kit (Applied  
147 Biosystems) according to manufacturer's protocol. Quantitative real-time PCR was performed on  
148 7900HT Fast Real-Time PCR system (Applied Biosystems). Relative gene expression was calculated  
149 by normalizing delta Ct values for each target probe to *Actb* levels for each sample using the 2<sup>- $\Delta$ Ct</sup>  
150 method. The following TaqMan Gene Expression Assays (Life Technologies) were used: human *Ifng*  
151 (Hs\_00989291\_m1), human *Actb* (Hs01060665\_g1).

## 152 **NanoString nCounter Gene Expression Profiling and Analysis**

153 Transcriptional profiling of mRNA isolated from rested and stimulated human iNKT cells and T<sub>CONV</sub>  
154 was performed using the nCounter SPRINT Profiler (NanoString Technologies). Briefly, per  
155 manufacturer's instructions, 50ng of each RNA sample was hybridized for 18 hours at 65°C with  
156 reporter and capture probe sets for the Human Metabolic Pathways panel (containing 768 genes  
157 across several annotated metabolic pathways and 20 internal reference genes). Hybridized RNA  
158 samples were then loaded onto nCounter SPRINT cartridge to run on SPRINT Profiler instrument.  
159 Gene expression analysis was conducted using NanoString nSolver 4.0 software. Genes with counts  
160 under 100 were eliminated from analysis. Heatmaps were generated using Morpheus  
161 (<https://software.broadinstitute.org/morpheus>).

## 162 **Cytokine Analysis**

163 Supernatants from 48-hour rested and stimulated iNKT cells and T<sub>CONV</sub> were assayed for cytokine  
164 levels of IFN- $\gamma$  using human ELISA kit (Invitrogen cat #88-7316) following manufacturer's protocol.  
165 Quantification of TNF- $\alpha$  and IL-4 cytokines in supernatants was performed using V-Plex Pro-  
166 Inflammatory Panel 1 Human Kit (Meso Scale Discovery, cat #K15049D). Assays were performed

167 per manufacturer's protocol and read and analyzed on a Meso Scale Discovery QuickPlex SQ120  
168 instrument.

### 169 **Seahorse XF Metabolic Analysis**

170 Real-time metabolic measurements of oxygen consumption rate (OCR) and extracellular acidification  
171 rate (ECAR) of iNKT cells and T<sub>CONV</sub> from matched donors were obtained using XFe96  
172 Extracellular Flux Analyzer (Seahorse Biosciences). On the day prior to assay, XF cartridge was  
173 hydrated, and XF tissue microplates were coated with Cell Tak (Corning cat #354240) per  
174 manufacturer's protocol. On the day of the assay, 48-hour stimulated iNKT cells and T<sub>CONV</sub> were  
175 washed and seeded at a density of 220,000 cells per well on pre-coated tissue microplates in XF  
176 RPMI assay media (pH 7.4) supplemented with 10mM glucose, 2mM L-glutamine, and 1mM  
177 pyruvate. Cells were spun down at 1500rpm for 3 minutes to facilitate adherence and placed in non-  
178 CO<sub>2</sub> incubator for one hour prior to running assay. The Long-Chain Fatty Acid Substrate Oxidation  
179 kit (Agilent cat #103672-100) was utilized to probe differences in OCR upon injection with either  
180 vehicle (media only) or etomoxir (4μM) to inhibit long-chain fatty acid oxidation. Following three  
181 basal measurements of OCR and ECAR, cells were sequentially injected with 1.5μM oligomycin A  
182 (ATP synthase inhibitor; Agilent Technologies), 0.5μM FCCP (mitochondrial uncoupling agent;  
183 Agilent Technologies), and 0.5μM rotenone/antimycin A (mitochondrial complex I and III inhibitors;  
184 Agilent Technologies). After injection of oligomycin A, six readings were taken; after the following  
185 two sequential injections, three readings were taken. Maximal respiration was calculated as the  
186 difference between OCR upon FCCP injection and non-mitochondrial respiration (OCR upon  
187 rotenone and antimycin A injection). ATP production was calculated as the difference in OCR prior  
188 to and after oligomycin A injection.

189

## 190 **RESULTS**

### 191 ***Human iNKT cells maintain anti-tumor effector functions in glucose-depleted culture conditions*** 192 ***relative to T<sub>CONV</sub>.***

193 To reliably obtain sufficient numbers of iNKT cells for our studies, we used populations of  
194 expanded, de-identified healthy human donor peripheral blood mononuclear cells (PBMC) and  
195 purified conventional T cells (T<sub>CONV</sub>; equal ratio of CD4<sup>+</sup> and CD8<sup>+</sup> cells) from matched donors (as  
196 per the schematic in **Supplemental Figure 1A**). To compare the metabolic and functional properties  
197 of human iNKT cells relative to T<sub>CONV</sub> under identical conditions, each cell type was subjected to 48  
198 hours of either rest (low-dose IL-2 only) or stimulation using anti-CD3/anti-CD28-coated  
199 microbeads.

200 We first investigated the dependency of human iNKT cells on glucose for anti-tumor cytokine  
201 production and cytotoxicity. Glucose is a limited nutrient within the TME and is rapidly metabolized  
202 by highly glycolytic tumor cells. Indeed, several prior studies have demonstrated that *in vitro* glucose  
203 depletion impairs the effector functions of T<sub>CONV</sub> (Cham and Gajewski, 2005; Cham et al., 2008;  
204 Chang et al., 2013) and that reliance on glycolysis confers poorer persistence and survival within the  
205 TME (Bengsch et al., 2016; Scharping et al., 2016). A recent study suggested that mouse iNKT cells  
206 uptake less glucose than CD4<sup>+</sup> T cells (Kumar et al., 2019), suggesting that they may be less reliant  
207 on glucose metabolism. To assess the requirement of glucose for human iNKT cell effector functions,  
208 iNKT cells and T<sub>CONV</sub> were rested or stimulated in culture conditions containing either standard  
209 glucose (10mM) or depleted glucose (1mM or 0.1mM) concentrations for 48 hours. Intriguingly,  
210 iNKT cells were able to maintain levels of both *Ifng* mRNA and secreted IFN-γ upon stimulation in

211 low glucose media (**Figure 1A-1D**). In contrast, T<sub>CONV</sub> were sensitive to glucose depletion and  
212 demonstrated a dose-dependent decrease in *Ifng* transcripts and IFN- $\gamma$  secreted protein levels.  
213 Strikingly, in 0.1mM glucose conditions, T<sub>CONV</sub> displayed an 85% reduction in stimulation-induced  
214 *Ifng* mRNA and an over 70% reduction in IFN- $\gamma$  protein secretion relative to 10mM glucose, while  
215 iNKT cells had no significant changes in IFN- $\gamma$  levels (**Figure 1A-1D**). In addition to IFN- $\gamma$   
216 secretion, we also observed a similar trend in the secretion of additional cytokines, including TNF- $\alpha$   
217 and IL-4 (**Supplemental Figure 2A-2B**), whereby iNKT cells did not rely on glucose for  
218 stimulation-induced secretion of these cytokines while T<sub>CONV</sub> demonstrated dose-dependent decreases  
219 in TNF- $\alpha$  and IL-4 secretion with reduced glucose.

220 We next investigated the dependency of these cells on glucose for cytotoxicity by measuring levels of  
221 intracellular granzyme B, a surrogate for anti-tumor cytotoxic granule exocytosis. We found that  
222 stimulated iNKT cells maintain similar levels of intracellular granzyme B in glucose-deplete  
223 conditions, whereas T<sub>CONV</sub> consistently displayed a significant reduction in granzyme B levels upon  
224 stimulation in lowered glucose concentrations (**Figure 1E**). Indeed, in 0.1mM glucose conditions,  
225 stimulated T<sub>CONV</sub> granzyme B levels were reduced by approximately 85% relative to 10mM glucose,  
226 while stimulated iNKT cells displayed no significant difference in granzyme B with reduced glucose  
227 (**Figure 1F**). As an additional approach, we also treated iNKT cells and T<sub>CONV</sub> with 2-deoxy-D-  
228 glucose (2-DG), a synthetic glucose analog that inhibits downstream glucose metabolism (Pajak et  
229 al., 2020). Although at a higher concentration of 2-DG (20mM), the effector functions of both iNKT  
230 cells and T<sub>CONV</sub> were impaired, iNKT cells did still retain some level of IFN- $\gamma$  production; however,  
231 at a lower concentration of 2-DG (2 mM), iNKT cells actually displayed moderately higher levels of  
232 cytokine production and cytotoxicity than in untreated conditions, while T<sub>CONV</sub> were sensitive to  
233 glycolytic inhibition (**Supplemental Figure 3A-3C**). Collectively, these data further support the  
234 notion that iNKT cells are less glucose-dependent for effector functions than T<sub>CONV</sub> and likely utilize  
235 alternate metabolic pathways upon stimulation.

### 236 ***Human iNKT cells are less glycolytic than T<sub>CONV</sub>.***

237 The striking differences in the sensitivity of iNKT cells and T<sub>CONV</sub> to glucose depletion suggest a  
238 potential underlying difference in glycolytic metabolism. While T<sub>CONV</sub> upregulate glycolysis upon  
239 stimulation, the metabolic activity of human iNKT cells is unknown. Using a NanoString probe set  
240 with over 700 curated transcripts for genes involved in cancer immunology and metabolism, we  
241 assayed changes in the mRNA expression of metabolic genes in rested and stimulated PBMC-derived  
242 iNKT cells and matched T<sub>CONV</sub> from 8 independent donors. In contrast to T<sub>CONV</sub>, which upregulated  
243 glycolytic pathway enzyme transcripts upon stimulation, iNKT cells only upregulated a small subset  
244 of the glycolytic genes upon stimulation, and to a lesser extent than T<sub>CONV</sub> (**Figure 2A**). Indeed, of  
245 the 14 glycolytic genes probed, 9 were significantly differentially expressed between stimulated  
246 T<sub>CONV</sub> and stimulated iNKT cells, and of these 9 genes, 7 were significantly higher in T<sub>CONV</sub>: *Hk2*,  
247 *Ldha*, *Ldhb*, *Aldoa*, *Eno1*, *Gapdh*, and *Pdha1* (**Figure 2B and Table 1**). Each of these genes encode  
248 key enzymes throughout the glycolysis pathway that also fuel additional biosynthetic pathways.

249 In T<sub>CONV</sub>, the transcription factor Myc is a master regulator required for initiation and maintenance of  
250 glycolytic metabolic reprogramming after TCR stimulation (Wang et al., 2011). In iNKT cells, the  
251 role of Myc, particularly upon activation, has not been previously examined. Consistent with reduced  
252 glycolytic reprogramming in stimulated iNKT cells, we also found that iNKT cells have significantly  
253 lower upregulation of Myc pathway genes than stimulated T<sub>CONV</sub> (**Supplemental Figure 4A-4B and**  
254 **Supplemental Table 1**). This difference in transcription of genes downstream of Myc signaling  
255 could suggest a mechanistic difference in the metabolic regulation of these two cell types.

256 Together, both the glycolysis and Myc pathway gene expression data suggest that human iNKT cells,  
257 in comparison to T<sub>CONV</sub>, employ distinct metabolic pathways from T<sub>CONV</sub> upon TCR stimulation.  
258 Importantly, iNKT cells' lack of dependence on glycolysis could be advantageous in the context of  
259 the TME, whereby iNKT cells may be able to maintain superior anti-tumor effector functions in  
260 glucose-diminished conditions in which T<sub>CONV</sub> are at a disadvantage.

261 ***Human iNKT cells are less sensitive to glutamine depletion than T<sub>CONV</sub> for maintaining effector***  
262 ***functions.***

263 Given that stimulated human iNKT cells were not dependent on glucose metabolism for effector  
264 functions, we wondered if they instead utilize glutamine as an alternative metabolic substrate to fuel  
265 cytokine production and cytotoxicity. Through glutaminolysis, glutamine is metabolized into  $\alpha$ -  
266 ketoglutarate, which directly enters the TCA cycle to eventually yield ATP via oxidative  
267 phosphorylation (OXPHOS). Upon TCR activation, T<sub>CONV</sub> increase both glutamine and glucose  
268 uptake and metabolism in order to fuel effector functions (Carr et al., 2010; Nakaya et al., 2014;  
269 Wang et al., 2011). In contrast, the role of glutamine has not yet been elucidated in iNKT cells. To  
270 investigate whether glutamine is required for iNKT cell effector functions, we rested and stimulated  
271 matched human iNKT and T<sub>CONV</sub> in either complete or glutamine-free media using the schema  
272 described in Supplementary Figure 1. Upon stimulation in glutamine-deplete conditions, iNKT cells  
273 display a moderate decrease in *Ifng* mRNA expression of ~40% of those stimulated in complete  
274 media, while T<sub>CONV</sub> reduced stimulation-induced *Ifng* mRNA expression by ~60% in glutamine-free  
275 conditions relative to complete media (**Figure 3A-3B**). Strikingly, IFN- $\gamma$  secretion was not altered in  
276 iNKT cells stimulated in the absence of glutamine, whereas it was reduced by ~90% in T<sub>CONV</sub>  
277 (**Figure 3C-3D**). These data imply a differential reliance on glutamine for cytokine production  
278 between these cell types. We also observed preserved secretion of additional cytokines (TNF- $\alpha$  and  
279 IL-4) by iNKT cells stimulated in glutamine-deplete conditions (**Supplemental Figure 5A-5B**).  
280 Furthermore, while glutamine depletion almost entirely abrogated T<sub>CONV</sub> intracellular granzyme B  
281 levels, iNKT cells were able to retain some granzyme B production even when stimulated in the  
282 absence of glutamine – measuring ~65% of that of levels in normal conditions (**Figure 3E-3F**). Thus,  
283 this indicates that unlike T<sub>CONV</sub>, glutamine is not required for iNKT cell cytotoxicity. Collectively,  
284 our data demonstrate that iNKT cells are able to maintain their effector functions in both glutamine-  
285 deplete and glucose-deplete media conditions, which may have important consequences for their  
286 ability to exert anti-tumor immunity within the nutrient-deplete TME.

287 ***Human iNKT cells have a “memory-like” metabolic phenotype.***

288 Memory T cells that develop after initial antigenic activation are primed for rapid reactivation upon  
289 secondary antigenic encounter. To allow for greater self-renewal capacity and longevity, memory T  
290 cells are metabolically adapted to possess altered mitochondrial morphology with enhanced spare  
291 respiratory capacity and a predominant reliance on oxidative and lipid metabolism (van der Windt et  
292 al., 2012, 2013). We postulated that human iNKT cells may be “memory-like” in their metabolism.  
293 iNKT cells are poised for activation and express memory-like phenotypic markers, including CD62L,  
294 CCR7, and CD45RO (Baev et al., 2004; D’Andrea et al., 2000). Furthermore, murine NKT cells have  
295 been shown to depend on OXPHOS for survival, proliferation, and effector functions relative to  
296 CD4<sup>+</sup> T cells (Kumar et al., 2019). Collectively, it also appears that iNKT cells do not have a distinct  
297 differentiation hierarchy of naïve, effector, and memory states, further suggesting that their  
298 underlying metabolic program may be unique from T<sub>CONV</sub>.

299 We first investigated mitochondrial parameters by flow cytometric dyes. Specifically, we utilized  
300 MitoTracker Green, which provides a measure of mitochondrial mass, as well as  
301 tetramethylrhodamine methyl ester perchlorate (TMRM), a cell permeable dye that accumulates in  
302 active mitochondria and serves as an indicator of mitochondrial membrane potential. We found that  
303 both resting and stimulated human iNKT cells have significantly higher mitochondrial mass (**Figure**  
304 **4A**) and mitochondrial membrane potential (**Figure 4B**) relative to unstimulated and stimulated  
305 T<sub>CONV</sub>. Together, this may imply greater mitochondrial activity within iNKT cells relative to T<sub>CONV</sub>.  
306 Furthermore, NanoString transcriptional profiling of these cells revealed that resting and stimulated  
307 iNKT cells displayed significantly higher expression of several fatty acid oxidation (FAO) enzyme  
308 transcripts than stimulated T<sub>CONV</sub> (**Figure 4C and Supplementary Table 2**). These genes include  
309 *Acaa2*, a mitochondrial enzyme involved in beta-oxidation of fatty acids into acetyl CoA, *Acat1* and  
310 *Acat2*, which convert ketones into acetyl-CoA, and *Acox1*, which also catalyzes beta-oxidation of  
311 fatty acids. One of the most striking differences was in the expression of *Cpt1a*, which encodes the  
312 rate-limiting enzyme of FAO that transports long-chain fatty acids into the mitochondria to be  
313 metabolized. Notably, *Cpt1a* was among the top 25 genes significantly higher in stimulated iNKT  
314 cells than stimulated T<sub>CONV</sub>, underscoring the potential importance of this enzyme for human iNKT  
315 cells. Indeed, in support of this transcriptional data, we also find that stimulated iNKT cells possess  
316 significantly higher levels of intracellular Cpt1a protein than rested iNKT cells and stimulated T<sub>CONV</sub>,  
317 as assessed by intracellular flow cytometry (**Figure 4D**). These data suggest that iNKT cells may  
318 predominantly utilize FAO metabolism upon stimulation, which could represent a key metabolic  
319 difference from T<sub>CONV</sub>.

320 In T<sub>CONV</sub>, Cpt1a-mediated long-chain FAO supports the survival of memory T cells and regulatory T  
321 cells (Michalek et al., 2011; Pearce et al., 2009). One master regulator that promotes FAO  
322 metabolism and memory cell differentiation is the nutrient sensor adenosine monophosphate-  
323 activated protein kinase (AMPK), which inhibits mTORC1 to promote catabolism and FAO,  
324 particularly in conditions of nutrient stress (Pearce et al., 2009; Rolf et al., 2013). To further  
325 investigate whether iNKT cells displayed memory-like metabolism by employing FAO, we  
326 interrogated the expression of the 29 annotated genes in the NanoString AMPK signaling pathway  
327 probe set in human donor cell subsets. Intriguingly, of the 14 genes significantly differentially  
328 expressed between stimulated iNKT cells and T<sub>CONV</sub>, 13 out of 14 were significantly higher in iNKT  
329 cells than stimulated T<sub>CONV</sub> (**Figure 4E**). This further supports an important and distinct role for FAO  
330 metabolism in human iNKT cells relative to T<sub>CONV</sub>.

### 331 ***Stimulated human iNKT cells oxidize fatty acids to a greater extent than stimulated T<sub>CONV</sub>.***

332 Given the striking differences in the expression of *Cpt1a* and other FAO genes between stimulated  
333 human iNKT cells and T<sub>CONV</sub>, we postulated that these cells may differ in their use of FAO  
334 metabolism. To investigate the dependence on FAO for the metabolic activity of iNKT cells and  
335 T<sub>CONV</sub> upon stimulation, we performed Seahorse extracellular flux analysis to generate real-time  
336 metabolic measurements of these cells. To specifically determine the contribution of fatty acids to the  
337 oxygen consumption rate (OCR) of stimulated iNKT cells and T<sub>CONV</sub>, we injected into the cells either  
338 media only (vehicle) or etomoxir, a pharmacological inhibitor of Cpt1a. Upon etomoxir treatment,  
339 long-chain fatty acid import into the mitochondria is blocked, such that cytosolic fatty acids cannot  
340 be oxidized via the TCA cycle to fuel OXPHOS. Interestingly, we found that upon addition of  
341 carbonyl cyanide-4 (trifluoromethoxy) phenylhydrazone (FCCP) – which decouples the  
342 mitochondrial membrane to drive maximal substrate demand – etomoxir-treated iNKT cells  
343 displayed significantly reduced maximal respiration (**Figure 5A, 5C**). This indicates that fatty acids  
344 represent an important substrate for oxidation in stimulated iNKT cells. In contrast, stimulated T<sub>CONV</sub>



345 maintained equal levels of OCR upon FAO inhibition (**Figure 5B-5C**), implying that in these cells,  
346 fatty acids do not represent a substrate for oxidation. In addition, we also quantified mitochondrial  
347 respiration-linked ATP production, defined as the difference in OCR at baseline and upon injection  
348 of oligomycin A, an ATP synthase inhibitor. Notably, this parameter was also significantly lowered  
349 in etomoxir-treated iNKT cells, but not in T<sub>CONV</sub> (**Figure 5D**), further supporting the importance of  
350 FAO for contributing to ATP production derived from mitochondrial respiration in stimulated iNKT  
351 cells. Interestingly, depletion of fatty acids did not completely ablate OCR activity of iNKT cells, as  
352 they still displayed heightened respiration upon addition of FCCP above basal OCR levels. This may  
353 suggest that iNKT cells do not solely depend on fatty acids and employ additional metabolic  
354 substrates for energy consumption upon stimulation. Nevertheless, our findings ultimately reveal a  
355 key bioenergetic difference between stimulated human iNKT cells and T<sub>CONV</sub>, whereby in stimulated  
356 iNKT cells, fatty acids serve as a substrate contributing to fueling the TCA cycle and OXPHOS,  
357 while T<sub>CONV</sub> preferentially rely on other substrates for oxidative metabolism, such as glucose and  
358 glutamine.

359 Taken together, our data reveals that human iNKT cells possess a unique metabolic profile from  
360 T<sub>CONV</sub>, characterized by greater FAO metabolism and a reduced requirement for glucose and  
361 glutamine for anti-tumor effector functions upon activation. Importantly, these differential  
362 bioenergetic requirements may allow iNKT cells to retain their functional activity in the nutrient-poor  
363 solid TME, where they may possess an advantage in competing with tumor cells relative to T<sub>CONV</sub>  
364 that could potentially be exploited therapeutically.

365

## 366 DISCUSSION

367 One of the major limitations of iNKT-cell based immunotherapies is the lack of understanding of the  
368 cellular properties enabling long-term persistence within the TME. While new insights have begun to  
369 highlight the importance of cellular metabolism for sustained effector function and persistence of  
370 effector T cells within the TME, these insights have not been extended to iNKT cells – particularly  
371 human iNKT cells. To address this gap in knowledge, we sought to delineate the bioenergetic  
372 requirements of human iNKT cells relative to their conventional T cell counterparts. In the present  
373 study, we demonstrate for the first time that primary human PBMC-derived iNKT cells possess  
374 distinct metabolic features from matched T<sub>CONV</sub> at both baseline and upon stimulation, and that these  
375 could impact anti-tumor effector functions. Specifically, we find that iNKT cells do not depend on  
376 glucose and glutamine for anti-tumor cytokine production and cytotoxicity, and rather possess a  
377 “memory-like” metabolic phenotype characterized by high mitochondrial mass and fatty acid  
378 oxidation metabolism. We believe these novel bioenergetic differences distinguish iNKT cells from  
379 T<sub>CONV</sub> and that these findings could suggest notable differences in the ability of these cells to adapt,  
380 survive, and function in nutrient-poor TME conditions – an assertion that has important implications  
381 for the use of iNKT cells in cancer immunotherapy.

382 The TME imposes metabolic challenges to the functions of T cells and other immune cells that  
383 directly impact antitumor immunity and tumor progression. As cancer and myeloid cells employ  
384 aerobic glycolysis to support biosynthetic requirements for proliferation via the Warburg effect, they  
385 rapidly uptake glucose, glutamine, and amino acids, depleting the TME of these nutrients  
386 (DeBerardinis and Chandel, 2016; Ghoshdastider et al., 2021; Pavlova and Thompson, 2016;  
387 Reinfeld et al., 2021); furthermore, the poor vasculature creates regions of hypoxia within the TME.  
388 As such, the hypoxic, acidic, nutrient-deplete TME impairs the ability of T<sub>CONV</sub> to sustain their  
389 functional activity. Indeed, it is well appreciated that the ability of T<sub>CONV</sub> to engage memory-like

390 FAO metabolism results in improved persistence and anti-tumor activity within the TME (reviewed  
391 in Kishton et al., 2017). As such, the design of metabolic interventions to improve the efficacy of  
392 solid tumor immunotherapies provide an attractive therapeutic strategy. However, due to the  
393 metabolic similarities between tumor cells and effector T<sub>CONV</sub> (Allison et al., 2017), preserving anti-  
394 tumor immune cell function while specifically targeting tumor cell metabolism is difficult. Our  
395 observations, however, imply that the distinct bioenergetic requirements employed by iNKT cells  
396 may allow for the utility of metabolic modulators to specifically target tumor cells and their  
397 supportive myeloid cells without profoundly affecting iNKT cell effector functions. Specifically, we  
398 found that stimulated iNKT cells retain anti-tumor functions despite glucose and glutamine depletion;  
399 furthermore, unlike T<sub>CONV</sub>, the effector mechanisms of iNKT cells appear to be decoupled from Myc  
400 signaling. Since Myc is an oncogenic driver in many cancers, targeting its activity is a key  
401 therapeutic strategy for attenuation of tumor cell growth. While such strategies would also  
402 significantly inhibit T<sub>CONV</sub> activation (Wang et al., 2011), iNKT cell activity may be less affected,  
403 supporting the notion that adjunctive therapies that both boost iNKT cell function and inhibit tumor  
404 metabolism could be therapeutically valuable. Similarly, the use of inhibitors of glucose and  
405 glutamine metabolism may effectively target the bioenergetics of tumor cells and tumor-supportive  
406 myeloid cells while allowing for sustained iNKT cell anti-tumor functions. Thus, the unique  
407 metabolic features of iNKT cells may enable the use of broader metabolic interventions to which  
408 T<sub>CONV</sub> may be particularly sensitive.

409 Interestingly, we observed that iNKT cells displayed higher expression of AMPK signaling genes  
410 relative to T<sub>CONV</sub>. AMPK is a nutrient sensor that inhibits mTORC1 to promote catabolism and  
411 mitochondrial metabolism, including FAO (Pearce et al., 2009; Rolf et al., 2013). Importantly,  
412 AMPK pathway activity has been shown to promote T cell longevity and survival, antigen recall  
413 responses in memory T cells (Blagih et al., 2015; Kishton et al., 2016), and additionally promote  
414 T<sub>REG</sub> differentiation and function (Michalek et al., 2011). Our data suggests that like memory T cells  
415 and T<sub>REG</sub> (as well as additional immunosuppressive populations, such as tumor-associated  
416 macrophages and myeloid-derived suppressor cells), the upregulation of AMPK-mediated catabolic  
417 metabolic programs may allow iNKT cells to adapt to the nutrient-deplete conditions of the TME.  
418 This presents a clear distinction from effector T<sub>CONV</sub>, which depend upon anabolic metabolic  
419 pathways to sustain anti-tumor functions. In T<sub>REG</sub>, the Forkhead Box protein (Foxp3) inhibits Myc  
420 signaling and glycolysis to promote OXPHOS and allow enhanced function in low-glucose, lactate-  
421 rich environments (Angelin et al., 2017). Although lactic acid has previously been shown to blunt the  
422 effector functions of T and NK cells (Brand et al., 2016), as well as murine iNKT cells *in vitro* (Xie  
423 et al., 2016), a further dissection of its contribution to human iNKT cells and a better understanding  
424 of the metabolic flexibility of iNKT cells in acidic TME environments is important. Intriguingly, a  
425 recent study demonstrated that intratumoral T<sub>REG</sub>, relative to peripheral T<sub>REG</sub>, require the uptake of  
426 lactate – secreted by tumor cells – to maintain their suppressive effector functions within the TME  
427 (Watson et al., 2021). It is thus possible that human iNKT cells, given their overlapping metabolic  
428 profile with T<sub>REG</sub>, could utilize similar mechanisms by which to employ metabolic flexibility in  
429 adapting to the acidic, nutrient-deplete TME. Given the link between *ex vivo* expansion and *in vivo*  
430 persistence of T<sub>CONV</sub> within solid tumors (Kishton et al., 2017), a greater understanding of the  
431 properties that would allow long-term persistence of exogenously expanded iNKT cells upon  
432 adoptive transfer is desired. Nevertheless, our data suggest that at least some proportion of human  
433 PBMC-derived iNKT cells are memory-like in metabolism and may thus prove to be persistent  
434 within the TME.

435 Despite being in its early clinical stages, iNKT cell-based immunotherapies have begun to  
436 demonstrate some promise for solid tumors. One approach in phase I and II trials is the direct,

437 adoptive transfer of activated iNKT cells, which has been tested in non-small cell lung cancer (Shin  
438 et al., 2001), head and neck squamous cell carcinoma (HNSCC; (Kunii et al., 2009)), and melanoma  
439 (Exley et al., 2017); these studies have demonstrated a transient boost in the numbers of circulating  
440 iNKT cells in patients and moderate stabilization of disease progression. Another approach currently  
441 under clinical investigation is the use of chimeric antigen receptor (CAR)-enabled iNKT cells. CAR-  
442 iNKT cells directed towards GD2, a disialoganglioside highly expressed on malignant neuroblastoma  
443 cells, are currently in phase I trials and preliminary studies indicate that the adoptively transferred  
444 iNKT cells localize to the tumor site and mediate tumor regression (Heczey et al., 2014, 2020).

445 A remaining challenge for the adoptive transfer strategies using iNKT cells is the ability to  
446 effectively expand sufficient numbers of cells *ex vivo*, given the low starting frequencies in peripheral  
447 blood. Recently, Zhu et al. demonstrated the preclinical feasibility and efficacy of hematopoietic  
448 stem cell (HSC)-derived iNKT cells to induce anti-tumor cytotoxicity in both hematologic and solid  
449 tumor models (Zhu et al., 2019). This may allow for greater scalability and broader utility of iNKT-  
450 cell based immunotherapies. Additionally, given that iNKT cells are stimulated by monomorphic  
451 CD1d, it is formally possible to explore the use of allogeneic off-the-shelf iNKT cell products in  
452 hosts with severe immunocompromise who lack endogenous T cells and are incapable of host vs.  
453 graft responses. Interestingly, two studies of both *ex vivo*-expanded iNKT cells and CAR-iNKT cells  
454 have demonstrated that the most persistent effector populations – that retain anti-tumor function and  
455 maintain longevity within the TME – are those that express CD62L (Tian et al., 2016) and are  
456 transduced with IL-15 (Xu et al., 2019). Notably, in T<sub>CONV</sub>, IL-15 promotes a more memory-like  
457 metabolic profile (van der Windt et al., 2012), and CD62L is also a central memory marker that is  
458 correlated with stem-like properties and enhanced anti-tumor efficacy (Graef et al., 2014;  
459 Sommermeyer et al., 2016; Wang et al., 2012); together, this further supports the link between iNKT  
460 cell metabolism and persistence in a tumor context. Overall, while iNKT cell-based immunotherapy  
461 platforms have demonstrated some early promise, ultimately, the long-term persistence and clinical  
462 efficacy remains unknown. However, the optimization of these strategies with additional knowledge  
463 gained from studies of iNKT cell metabolism would be of great value.

464 The present study is the first to characterize primary human iNKT cell metabolism side-by-side with  
465 T<sub>CONV</sub>, and interestingly, reveals bioenergetic and functional differences between these lymphocyte  
466 populations that may bear important future clinical impact. Importantly, while our results suggest that  
467 iNKT cells may be more facile at adapting to the TME, they also prompt the need for metabolic  
468 characterization of iNKT cell subsets at baseline and upon stimulation directly from within the TME.  
469

## 470 **CONFLICT OF INTEREST STATEMENT**

471 Hamid Bassiri is a paid consultant and a stockholder of Kriya Therapeutics. Stephan Grupp receives  
472 study support from Novartis, Kite Pharma, Vertex Pharmaceuticals, and Servier Laboratories. He  
473 consults for Novartis, Roche, GSK, Humanigen, CBMG, and Janssen. He is on study steering  
474 committees or scientific advisory boards for Novartis, Jazz Pharmaceuticals, Adaptimmune, TCR2,  
475 Collectis, Juno Therapeutics, Vertex Pharmaceuticals, Allogene Therapeutics and Cabaletta Bio. He  
476 has a patent (Toxicity management for anti-tumor activity of CARs, WO 2014011984 A1) that is  
477 managed according to the University of Pennsylvania patent policy. David Barrett is an employee of  
478 Tmunity Therapeutics. None of the other authors have any disclosures to declare.  
479

## 480 **AUTHOR CONTRIBUTIONS**

481 P.K. and H.B. conceived study and wrote manuscript. P.K. designed and performed experiments,  
482 analyzed data, and constructed figures. C.B. contributed to conducting experiments and data analysis.  
483 S.A.G. and D.M.B. provided key reagents required for experiments. U.H.B. and D.M.B. provided  
484 technical expertise, contributed to experimental design and analysis, and critically reviewed  
485 manuscript. All authors contributed to the manuscript and approved of the submitted version.  
486

## 487 **FUNDING**

488 This work was supported by grants from the NIH National Cancer Institute (NRSA F31 CA232468-  
489 01 awarded to P.K. and U01 CA-232361-01A1 awarded to D.M.B. and S.A.G.), the Team Connor  
490 Childhood Cancer Foundation (awarded to H.B.), and the Kate Amato Foundation (awarded to H.B.).  
491

## 492 **ACKNOWLEDGEMENTS**

493 We would like to thank our colleagues Sunny Shin, Kathryn Wellen, Taku Kambayashi, and Will  
494 Bailis (University of Pennsylvania) for offering scientific expertise in experimental analysis and  
495 manuscript preparation. We also thank our former lab member Gabrielle Ferry (University College  
496 London) for critical review of the manuscript. We gratefully acknowledge Rajat Das and Ted  
497 Hofmann (CHOP) for providing key technical assistance with Seahorse flux metabolic assays and  
498 NanoString nCounter transcriptional profiling, respectively. Kevin Bittman (Agilent) provided  
499 technical guidance and data analysis support for Seahorse experiments, and Allison Songstad  
500 (NanoString) assisted with NanoString data analysis. We would finally like to thank the CHOP Flow  
501 Cytometry Core and the University of Pennsylvania (UPenn) Flow Cytometry and Human  
502 Immunology Cores for providing key reagents (primary human cells) and instrumentation (cell  
503 sorters) required for experiments.  
504

## 505 **DATA AVAILABILITY STATEMENT**

506 Data requests may be directed to the corresponding author, Hamid Bassiri, at [bassiri@chop.edu](mailto:bassiri@chop.edu).  
507

## 508 **REFERENCES**

- 509 Allison, K.E., Coomber, B.L., and Bridle, B.W. (2017). Metabolic reprogramming in the tumour  
510 microenvironment: a hallmark shared by cancer cells and T lymphocytes. *Immunology* *152*, 175–  
511 184.
- 512 Altman, J.B., Benavides, A.D., Das, R., and Bassiri, H. (2015). Antitumor Responses of Invariant  
513 Natural Killer T Cells. *J Immunol Res* *2015*, 652875.
- 514 Angelin, A., Gil-de-Gómez, L., Dahiya, S., Jiao, J., Guo, L., Levine, M.H., Wang, Z., Quinn, W.,  
515 Kopinski, P.K., Wang, L., et al. (2017). Foxp3 reprograms T cell metabolism to function in low  
516 glucose high lactate environments. *Cell Metab* *25*, 1282-1293.e7.
- 517 Baev, D.V., Peng, X., Song, L., Barnhart, J.R., Crooks, G.M., Weinberg, K.I., and Metelitsa, L.S.  
518 (2004). Distinct homeostatic requirements of CD4<sup>+</sup> and CD4<sup>-</sup> subsets of V $\alpha$ 24-invariant natural  
519 killer T cells in humans. *Blood* *104*, 4150–4156.

- 520 Bassiri, H., Das, R., Guan, P., Barrett, D.M., Brennan, P.J., Banerjee, P.P., Wiener, S.J., Orange, J.S.,  
521 Brenner, M.B., Grupp, S.A., et al. (2014). iNKT Cell Cytotoxic Responses Control T-Lymphoma  
522 Growth *In Vitro* and *In Vivo*. *Cancer Immunol Res* 2, 59–69.
- 523 Bendelac, A., Savage, P.B., and Teyton, L. (2007). The Biology of NKT Cells. *Annual Review of*  
524 *Immunology* 25, 297–336.
- 525 Bengsch, B., Johnson, A.L., Kurachi, M., Odorizzi, P.M., Pauken, K.E., Attanasio, J., Stelekati, E.,  
526 McLane, L.M., Paley, M.A., Delgoffe, G.M., et al. (2016). Bioenergetic Insufficiencies Due to  
527 Metabolic Alterations Regulated by the Inhibitory Receptor PD-1 Are an Early Driver of CD8(+) T  
528 Cell Exhaustion. *Immunity* 45, 358–373.
- 529 Blagih, J., Coulombe, F., Vincent, E.E., Dupuy, F., Galicia-Vázquez, G., Yurchenko, E., Raissi, T.C.,  
530 van der Windt, G.J.W., Viollet, B., Pearce, E.L., et al. (2015). The Energy Sensor AMPK Regulates  
531 T Cell Metabolic Adaptation and Effector Responses *In Vivo*. *Immunity* 42, 41–54.
- 532 Brand, A., Singer, K., Koehl, G.E., Kolitzus, M., Schoenhammer, G., Thiel, A., Matos, C., Bruss, C.,  
533 Klobuch, S., Peter, K., et al. (2016). LDHA-Associated Lactic Acid Production Blunts Tumor  
534 Immunosurveillance by T and NK Cells. *Cell Metabolism* 24, 657–671.
- 535 Brennan, P.J., Brigl, M., and Brenner, M.B. (2013). Invariant natural killer T cells: an innate  
536 activation scheme linked to diverse effector functions. *Nat Rev Immunol* 13, 101–117.
- 537 Buck, M.D., O’Sullivan, D., Klein Geltink, R.I., Curtis, J.D., Chang, C.-H., Sanin, D.E., Qiu, J.,  
538 Kretz, O., Braas, D., van der Windt, G.J.W., et al. (2016). Mitochondrial Dynamics Controls T Cell  
539 Fate through Metabolic Programming. *Cell* 166, 63–76.
- 540 Carnaud, C., Lee, D., Donnars, O., Park, S.-H., Beavis, A., Koezuka, Y., and Bendelac, A. (1999).  
541 Cutting Edge: Cross-Talk Between Cells of the Innate Immune System: NKT Cells Rapidly Activate  
542 NK Cells. *J Immunol* 163, 4647–4650.
- 543 Carr, E.L., Kelman, A., Wu, G.S., Gopaul, R., Senkevitch, E., Aghvanyan, A., Turay, A.M., and  
544 Frauwirth, K.A. (2010). Glutamine uptake and metabolism are coordinately regulated by  
545 ERK/MAPK during T lymphocyte activation. *J Immunol* 185, 1037–1044.
- 546 Cham, C.M., and Gajewski, T.F. (2005). Glucose availability regulates IFN-gamma production and  
547 p70S6 kinase activation in CD8+ effector T cells. *J Immunol* 174, 4670–4677.
- 548 Cham, C.M., Driessens, G., O’Keefe, J.P., and Gajewski, T.F. (2008). Glucose deprivation inhibits  
549 multiple key gene expression events and effector functions in CD8+ T cells. *Eur J Immunol* 38,  
550 2438–2450.
- 551 Chang, C.-H., Curtis, J.D., Maggi, L.B., Faubert, B., Villarino, A.V., O’Sullivan, D., Huang, S.C.-C.,  
552 van der Windt, G.J.W., Blagih, J., Qiu, J., et al. (2013). Posttranscriptional Control of T Cell Effector  
553 Function by Aerobic Glycolysis. *Cell* 153, 1239–1251.
- 554 Chang, C.-H., Qiu, J., O’Sullivan, D., Buck, M.D., Noguchi, T., Curtis, J.D., Chen, Q., Gindin, M.,  
555 Gubin, M.M., van der Windt, G.J.W., et al. (2015). Metabolic Competition in the Tumor  
556 Microenvironment Is a Driver of Cancer Progression. *Cell* 162, 1229–1241.

- 557 Crowe, N.Y., Smyth, M.J., and Godfrey, D.I. (2002). A Critical Role for Natural Killer T Cells in  
558 Immunosurveillance of Methylcholanthrene-induced Sarcomas. *Journal of Experimental Medicine*  
559 *196*, 119–127.
- 560 D’Andrea, A., Goux, D., Lalla, C.D., Koezuka, Y., Montagna, D., Moretta, A., Dellabona, P.,  
561 Casorati, G., and Abrignani, S. (2000). Neonatal invariant V $\alpha$ 24<sup>+</sup> NKT lymphocytes are activated  
562 memory cells. *European Journal of Immunology* *30*, 1544–1550.
- 563 DeBerardinis, R.J., and Chandel, N.S. (2016). Fundamentals of cancer metabolism. *Science*  
564 *Advances* *2*, e1600200.
- 565 Exley, M.A., Friedlander, P., Alatrakchi, N., Vriend, L., Yue, S., Sasada, T., Zeng, W., Mizukami,  
566 Y., Clark, J., Nemer, D., et al. (2017). Adoptive Transfer of Invariant NKT Cells as Immunotherapy  
567 for Advanced Melanoma: A Phase I Clinical Trial. *Clin Cancer Res* *23*, 3510–3519.
- 568 Fu, S., He, K., Tian, C., Sun, H., Zhu, C., Bai, S., Liu, J., Wu, Q., Xie, D., Yue, T., et al. (2020).  
569 Impaired lipid biosynthesis hinders anti-tumor efficacy of intratumoral iNKT cells. *Nat Commun* *11*,  
570 438.
- 571 Ghoshdastider, U., Rohatgi, N., Mojtavavi Naeini, M., Baruah, P., Revkov, E., Guo, Y.A., Rizzetto,  
572 S., Wong, A.M.L., Solai, S., Nguyen, T.T., et al. (2021). Pan-cancer analysis of ligand-receptor  
573 crosstalk in the tumor microenvironment. *Cancer Res*.
- 574 Graef, P., Buchholz, V.R., Stemberger, C., Flossdorf, M., Henkel, L., Schiemann, M., Drexler, I.,  
575 Höfer, T., Riddell, S.R., and Busch, D.H. (2014). Serial transfer of single-cell-derived  
576 immunocompetence reveals stemness of CD8(+) central memory T cells. *Immunity* *41*, 116–126.
- 577 Heczey, A., Liu, D., Tian, G., Courtney, A.N., Wei, J., Marinova, E., Gao, X., Guo, L., Yvon, E.,  
578 Hicks, J., et al. (2014). Invariant NKT cells with chimeric antigen receptor provide a novel platform  
579 for safe and effective cancer immunotherapy. *Blood* *124*, 2824–2833.
- 580 Heczey, A., Courtney, A.N., Montalbano, A., Robinson, S., Liu, K., Li, M., Ghatwai, N., Dakhova,  
581 O., Liu, B., Raveh-Sadka, T., et al. (2020). Anti-GD2 CAR-NKT cells in patients with relapsed or  
582 refractory neuroblastoma: an interim analysis. *Nat Med* *26*, 1686–1690.
- 583 Ho, P.-C., Bihuniak, J.D., Macintyre, A.N., Staron, M., Liu, X., Amezcua, R., Tsui, Y.-C., Cui, G.,  
584 Micevic, G., Perales, J.C., et al. (2015). Phosphoenolpyruvate Is a Metabolic Checkpoint of Anti-  
585 tumor T Cell Responses. *Cell* *162*, 1217–1228.
- 586 Iyoda, T., Yamasaki, S., Hidaka, M., Kawano, F., Abe, Y., Suzuki, K., Kadowaki, N., Shimizu, K.,  
587 and Fujii, S. (2018). Amelioration of NK cell function driven by V $\alpha$ 24<sup>+</sup> invariant NKT cell  
588 activation in multiple myeloma. *Clinical Immunology* *187*, 76–84.
- 589 Kawano, T., Cui, J., Koezuka, Y., Toura, I., Kaneko, Y., Motoki, K., Ueno, H., Nakagawa, R., Sato,  
590 H., Kondo, E., et al. (1997). CD1d-Restricted and TCR-Mediated Activation of V $\alpha$ 14 NKT Cells by  
591 Glycosylceramides. *Science* *278*, 1626–1629.
- 592 Kishton, R.J., Barnes, C.E., Nichols, A.G., Cohen, S., Gerriets, V.A., Siska, P.J., Macintyre, A.N.,  
593 Goraksha-Hicks, P., de Cubas, A.A., Liu, T., et al. (2016). AMPK Is Essential to Balance Glycolysis  
594 and Mitochondrial Metabolism to Control T-ALL Cell Stress and Survival. *Cell Metab* *23*, 649–662.

- 595 Kishton, R.J., Sukumar, M., and Restifo, N.P. (2017). Metabolic Regulation of T Cell Longevity and  
596 Function in Tumor Immunotherapy. *Cell Metabolism* 26, 94–109.
- 597 Kitamura, H., Iwakabe, K., Yahata, T., Nishimura, S., Ohta, A., Ohmi, Y., Sato, M., Takeda, K.,  
598 Okumura, K., Kaer, L.V., et al. (1999). The Natural Killer T (NKT) Cell Ligand  $\alpha$ -  
599 Galactosylceramide Demonstrates Its Immunopotentiating Effect by Inducing Interleukin (IL)-12  
600 Production by Dendritic Cells and IL-12 Receptor Expression on NKT Cells. *J Exp Med* 189, 1121–  
601 1128.
- 602 Kumar, A., Pyaram, K., Yarosz, E.L., Hong, H., Lyssiotis, C.A., Giri, S., and Chang, C.-H. (2019).  
603 Enhanced oxidative phosphorylation in NKT cells is essential for their survival and function. *Proc*  
604 *Natl Acad Sci USA* 116, 7439–7448.
- 605 Kunii, N., Horiguchi, S., Motohashi, S., Yamamoto, H., Ueno, N., Yamamoto, S., Sakurai, D.,  
606 Taniguchi, M., Nakayama, T., and Okamoto, Y. (2009). Combination therapy of in vitro-expanded  
607 natural killer T cells and  $\alpha$ -galactosylceramide-pulsed antigen-presenting cells in patients with  
608 recurrent head and neck carcinoma. *Cancer Science* 100, 1092–1098.
- 609 Matsuda, J.L., Mallewaey, T., Scott-Browne, J., and Gapin, L. (2008). CD1d-restricted iNKT cells,  
610 the ‘Swiss-Army knife’ of the immune system. *Current Opinion in Immunology* 20, 358–368.
- 611 Metelitsa, L.S., Naidenko, O.V., Kant, A., Wu, H.-W., Loza, M.J., Perussia, B., Kronenberg, M., and  
612 Seeger, R.C. (2001). Human NKT Cells Mediate Antitumor Cytotoxicity Directly by Recognizing  
613 Target Cell CD1d with Bound Ligand or Indirectly by Producing IL-2 to Activate NK Cells. *J*  
614 *Immunol* 167, 3114–3122.
- 615 Michalek, R.D., Gerriets, V.A., Jacobs, S.R., Macintyre, A.N., MacIver, N.J., Mason, E.F., Sullivan,  
616 S.A., Nichols, A.G., and Rathmell, J.C. (2011). Cutting Edge: Distinct Glycolytic and Lipid  
617 Oxidative Metabolic Programs Are Essential for Effector and Regulatory CD4<sup>+</sup> T Cell Subsets. *J.I.*  
618 *186*, 3299–3303.
- 619 Mise, N., Takami, M., Suzuki, A., Kamata, T., Harada, K., Hishiki, T., Saito, T., Terui, K.,  
620 Mitsunaga, T., Nakata, M., et al. (2016). Antibody-dependent cellular cytotoxicity toward  
621 neuroblastoma enhanced by activated invariant natural killer T cells. *Cancer Sci* 107, 233–241.
- 622 Mussai, F., De Santo, C., and Cerundolo, V. (2012). Interaction between invariant NKT cells and  
623 myeloid-derived suppressor cells in cancer patients: evidence and therapeutic opportunities. *J*  
624 *Immunother* 35, 449–459.
- 625 Nakaya, M., Xiao, Y., Zhou, X., Chang, J.-H., Chang, M., Cheng, X., Blonska, M., Lin, X., and Sun,  
626 S.-C. (2014). Inflammatory T cell responses rely on amino acid transporter ASCT2 facilitation of  
627 glutamine uptake and mTORC1 kinase activation. *Immunity* 40, 692–705.
- 628 Pajak, B., Siwiak, E., Sołtyka, M., Priebe, A., Zieliński, R., Fokt, I., Ziemiak, M., Jaśkiewicz, A.,  
629 Borowski, R., Domoradzki, T., et al. (2020). 2-Deoxy-d-Glucose and Its Analogs: From Diagnostic  
630 to Therapeutic Agents. *International Journal of Molecular Sciences* 21, 234.
- 631 Pavlova, N.N., and Thompson, C.B. (2016). The Emerging Hallmarks of Cancer Metabolism. *Cell*  
632 *Metab* 23, 27–47.

- 633 Pearce, E.L., Walsh, M.C., Cejas, P.J., Harms, G.M., Shen, H., Wang, L.-S., Jones, R.G., and Choi,  
634 Y. (2009). Enhancing CD8 T Cell Memory by Modulating Fatty Acid Metabolism. *Nature* *460*, 103–  
635 107.
- 636 Pearce, E.L., Poffenberger, M.C., Chang, C.-H., and Jones, R.G. (2013). Fueling immunity: insights  
637 into metabolism and lymphocyte function. *Science* *342*, 1242454.
- 638 Reinfeld, B.I., Madden, M.Z., Wolf, M.M., Chytil, A., Bader, J.E., Patterson, A.R., Sugiura, A.,  
639 Cohen, A.S., Ali, A., Do, B.T., et al. (2021). Cell-programmed nutrient partitioning in the tumour  
640 microenvironment. *Nature*.
- 641 Rolf, J., Zarrouk, M., Finlay, D.K., Foretz, M., Viollet, B., and Cantrell, D.A. (2013). AMPK $\alpha$ 1: A  
642 glucose sensor that controls CD8 T-cell memory. *Eur J Immunol* *43*, 889–896.
- 643 Rotolo, A., Caputo, V.S., Holubova, M., Baxan, N., Dubois, O., Chaudhry, M.S., Xiao, X.,  
644 Goudevenou, K., Pitcher, D.S., Petevi, K., et al. (2018). Enhanced Anti-lymphoma Activity of  
645 CAR19-iNKT Cells Underpinned by Dual CD19 and CD1d Targeting. *Cancer Cell* *34*, 596-610.e11.
- 646 Scharping, N.E., Menk, A.V., Moreci, R.S., Whetstone, R.D., Dadey, R.E., Watkins, S.C., Ferris,  
647 R.L., and Delgoffe, G.M. (2016). The Tumor Microenvironment Represses T Cell Mitochondrial  
648 Biogenesis to Drive Intratumoral T Cell Metabolic Insufficiency and Dysfunction. *Immunity* *45*,  
649 374–388.
- 650 Shin, T., Nakayama, T., Akutsu, Y., Motohashi, S., Shibata, Y., Harada, M., Kamada, N., Shimizu,  
651 C., Shimizu, E., Saito, T., et al. (2001). Inhibition of tumor metastasis by adoptive transfer of IL-12-  
652 activated V $\alpha$ 14 NKT cells. *International Journal of Cancer* *91*, 523–528.
- 653 Smyth, M.J., Crowe, N.Y., Pellicci, D.G., Kyriakopoulos, K., Kelly, J.M., Takeda, K., Yagita, H., and  
654 Godfrey, D.I. (2002). Sequential production of interferon- $\gamma$  by NK1.1+ T cells and natural killer cells  
655 is essential for the antimetastatic effect of  $\alpha$ -galactosylceramide. *Blood* *99*, 1259–1266.
- 656 Sommermeyer, D., Hudecek, M., Kosasih, P.L., Gogishvili, T., Maloney, D.G., Turtle, C.J., and  
657 Riddell, S.R. (2016). Chimeric antigen receptor-modified T cells derived from defined CD8+ and  
658 CD4+ subsets confer superior antitumor reactivity in vivo. *Leukemia* *30*, 492–500.
- 659 Song, L., Asgharzadeh, S., Salo, J., Engell, K., Wu, H., Sposto, R., Ara, T., Silverman, A.M.,  
660 DeClerck, Y.A., Seeger, R.C., et al. (2009). V $\alpha$ 24-invariant NKT cells mediate antitumor activity via  
661 killing of tumor-associated macrophages. *J. Clin. Invest.* *119*, 1524–1536.
- 662 Sukumar, M., Liu, J., Ji, Y., Subramanian, M., Crompton, J.G., Yu, Z., Roychoudhuri, R., Palmer,  
663 D.C., Muranski, P., Karoly, E.D., et al. (2013). Inhibiting glycolytic metabolism enhances CD8+ T  
664 cell memory and antitumor function. *J Clin Invest* *123*, 4479–4488.
- 665 Tian, G., Courtney, A.N., Jena, B., Heczey, A., Liu, D., Marinova, E., Guo, L., Xu, X., Torikai, H.,  
666 Mo, Q., et al. (2016). CD62L+ NKT cells have prolonged persistence and antitumor activity in vivo.  
667 *Journal of Clinical Investigation* *126*, 2341–2355.
- 668 Wang, R., Dillon, C.P., Shi, L.Z., Milasta, S., Carter, R., Finkelstein, D., McCormick, L.L.,  
669 Fitzgerald, P., Chi, H., Munger, J., et al. (2011). The Transcription Factor Myc Controls Metabolic  
670 Reprogramming upon T Lymphocyte Activation. *Immunity* *35*, 871–882.



- 671 Wang, X., Naranjo, A., Brown, C.E., Bautista, C., Wong, C.W., Chang, W.-C., Aguilar, B., Ostberg,  
672 J.R., Riddell, S.R., Forman, S.J., et al. (2012). Phenotypic and functional attributes of lentivirus-  
673 modified CD19-specific human CD8<sup>+</sup> central memory T cells manufactured at clinical scale. *J*  
674 *Immunother* 35, 689–701.
- 675 Watson, M.J., Vignali, P.D.A., Mullett, S.J., Overacre-Delgoffe, A.E., Peralta, R.M., Grebinoski, S.,  
676 Menk, A.V., Rittenhouse, N.L., DePeaux, K., Whetstone, R.D., et al. (2021). Metabolic support of  
677 tumour-infiltrating regulatory T cells by lactic acid. *Nature*.
- 678 van der Windt, G., Everts, B., Chang, C.-H., Curtis, J.D., Freitas, T.C., Amiel, E., Pearce, E.J., and  
679 Pearce, E.L. (2012). Mitochondrial Respiratory Capacity Is a Critical Regulator of CD8<sup>+</sup> T Cell  
680 Memory Development. *Immunity* 36, 68–78.
- 681 van der Windt, G.J.W., O’Sullivan, D., Everts, B., Huang, S.C.-C., Buck, M.D., Curtis, J.D., Chang,  
682 C.-H., Smith, A.M., Ai, T., Faubert, B., et al. (2013). CD8 memory T cells have a bioenergetic  
683 advantage that underlies their rapid recall ability. *Proceedings of the National Academy of Sciences*  
684 110, 14336–14341.
- 685 Wolf, B.J., Choi, J.E., and Exley, M.A. (2018). Novel Approaches to Exploiting Invariant NKT Cells  
686 in Cancer Immunotherapy. *Front. Immunol.* 9, 384.
- 687 Xie, D., Zhu, S., and Bai, L. (2016). Lactic acid in tumor microenvironments causes dysfunction of  
688 NKT cells by interfering with mTOR signaling. *Sci. China Life Sci.* 59, 1290–1296.
- 689 Xu, X., Huang, W., Heczey, A., Liu, D., Guo, L., Wood, M., Jin, J., Courtney, A.N., Liu, B., Di  
690 Pierro, E.J., et al. (2019). NKT Cells Coexpressing a GD2-Specific Chimeric Antigen Receptor and  
691 IL15 Show Enhanced *In Vivo* Persistence and Antitumor Activity against Neuroblastoma. *Clin*  
692 *Cancer Res* 25, 7126–7138.
- 693 Yamasaki, K., Horiguchi, S., Kurosaki, M., Kunii, N., Nagato, K., Hanaoka, H., Shimizu, N., Ueno,  
694 N., Yamamoto, S., Taniguchi, M., et al. (2011). Induction of NKT cell-specific immune responses in  
695 cancer tissues after NKT cell-targeted adoptive immunotherapy. *Clin Immunol* 138, 255–265.
- 696 Zhu, Y., Smith, D.J., Zhou, Y., Li, Y.-R., Yu, J., Lee, D., Wang, Y.-C., Di Biase, S., Wang, X.,  
697 Hardoy, C., et al. (2019). Development of Hematopoietic Stem Cell-Engineered Invariant Natural  
698 Killer T Cell Therapy for Cancer. *Cell Stem Cell* 25, 542-557.e9.

699

## 700 **FIGURE LEGENDS**

701 **Figure 1: Human iNKT cells do not depend on glucose for anti-tumor effector functions**  
702 **relative to T<sub>CONV</sub>.** Sorted PBMC-derived iNKT cells and T<sub>CONV</sub> were rested or stimulated in RPMI  
703 media containing 10mM, 1mM, or 0.1mM glucose for 48 hours per schematic in Supplemental  
704 Figure 1. (A) mRNA expression of *Ifng* was determined for iNKT cells (left) and T<sub>CONV</sub> (right) at 48  
705 hours by qPCR (with values normalized to *Actb* expression). Fold change induction of *Ifng* upon  
706 stimulation relative to rest (iNKT) and unstimulated (T<sub>CONV</sub>) conditions displayed. Each symbol  
707 represents matched, independent human donor replicates. (B) Summary data of fold change in *Ifng* Ct  
708 upon stimulation (relative to 10mM glucose conditions) is depicted for iNKT and T<sub>CONV</sub> from qPCR  
709 in (A). (C) Supernatants were collected from rested and stimulated iNKT cells (left) and T<sub>CONV</sub>

710 (right) after 48 hours. IFN- $\gamma$  levels were detected via ELISA and fold change upregulation upon  
711 stimulation relative to rest (iNKT) and unstimulated ( $T_{CONV}$ ) conditions displayed. Each symbol  
712 represents matched, independent human donor replicates. **(D)** Summary data of percent change in  
713 IFN- $\gamma$  secretion fold change upon stimulation relative to 10mM glucose is depicted for iNKT and  
714  $T_{CONV}$  from ELISA in (C). **(E)** Rested and stimulated iNKT cells and  $T_{CONV}$  from matched human  
715 donors were stained for intracellular Granzyme B or isotype control; histogram of live, stimulated  
716 iNKT cells and  $T_{CONV}$  representative of 4 matched, independent human donor samples. **(F)**  
717 Quantification of granzyme B mean fluorescence intensity (MFI) of stimulated iNKT cells and  $T_{CONV}$   
718 normalized to isotype MFI indicated in bar graph. For all graphs, asterisks indicate statistical  
719 significance (\* $p$ <0.05, \*\* $p$ <0.01, \*\*\* $p$ <0.001).

720 **Figure 2: Human iNKT cells are less glycolytic than  $T_{CONV}$ .** **(A)** Heatmap of 8 independent,  
721 healthy human donor rested and stimulated iNKT cells and matched  $T_{CONV}$  (processed per schematic  
722 in Supplemental Figure 1) transcriptional profiles for genes in the glycolysis pathway included in the  
723 NanoString nCounter Human Metabolic Pathways probe set. Genes with counts under 100 were  
724 eliminated from analysis. Coloring indicates relative expression of each gene, from low (blue) to high  
725 (red). Heatmap generated on Morpheus. **(B)** Pie chart graphically displaying proportion of glycolysis  
726 genes significantly higher in each stimulated cell subset.

727 **Figure 3: Human iNKT cells are less reliant on glutamine for anti-tumor effector functions**  
728 **than  $T_{CONV}$ .** Sorted PBMC-derived iNKT cells and  $T_{CONV}$  were rested or stimulated in either  
729 complete RPMI (10% FBS, 1% L-glutamine) or glutamine-free RPMI media for 48 hours per  
730 schematic in Supplemental Figure 1. **(A)** mRNA expression of *Ifng* was determined for iNKT cells  
731 (left) and  $T_{CONV}$  (right) at 48 hours by qPCR (with values normalized to *Actb* expression). Fold  
732 change induction of *Ifng* upon stimulation relative to rest (iNKT) and unstimulated ( $T_{CONV}$ )  
733 conditions displayed. Each symbol represents matched, independent human donor replicates. **(B)**  
734 Summary data of fold change in *Ifng* Ct upon stimulation (relative to cRPMI condition) is depicted  
735 for iNKT and  $T_{CONV}$  from qPCR in (A). **(C)** Supernatants were collected from rested and stimulated  
736 iNKT cells (left) and  $T_{CONV}$  (right) after 48 hours. IFN- $\gamma$  levels were detected via ELISA and fold  
737 change upregulation upon stimulation relative to rest (iNKT) and unstimulated ( $T_{CONV}$ ) conditions  
738 displayed. Each symbol represents matched, independent human donor replicates. **(D)** Summary data  
739 of percent change in IFN- $\gamma$  secretion fold change upon stimulation relative to cRPMI is depicted for  
740 iNKT and  $T_{CONV}$  from ELISA in (C). **(E)** Rested and stimulated iNKT cells and  $T_{CONV}$  from matched  
741 human donors were stained for intracellular Granzyme B or isotype control; histogram of live,  
742 stimulated iNKT cells and  $T_{CONV}$  representative of 4 matched, independent human donor samples.  
743 **(F)** Quantification of granzyme B mean fluorescence intensity (MFI) of stimulated iNKT cells and  
744  $T_{CONV}$  normalized to isotype MFI indicated in bar graph. For all graphs, asterisks indicate statistical  
745 significance (\* $p$ <0.05, \*\* $p$ <0.01, \*\*\* $p$ <0.001).

746 **Figure 4: Human iNKT cells have a “memory-like” metabolic phenotype comprised of**  
747 **enhanced mitochondrial metabolism and FAO.** **(A)** Histograms (left) displaying mean  
748 fluorescence intensity (MFI) of MitoTracker Green emission (FITC channel) in purified rested and  
749 stimulated iNKT cells and  $T_{CONV}$  from matching human donor samples. (Right) Bar graphs of MFIs.  
750 Symbols represent independent, matched human donors. **(B)** Histograms (left) displaying mean  
751 fluorescence intensity (MFI) of TMRM emission (PE channel) in purified rested and stimulated  
752 iNKT cells and  $T_{CONV}$  from matching human donor samples. (Right) Bar graphs of MFIs. Symbols  
753 represent independent, matched human donors. **(C)** Heatmap of  $n=8$  independent, matched healthy  
754 human donor rested and stimulated iNKT cells and  $T_{CONV}$  (processed per schematic in Supplemental  
755 Figure 1) relative expression of fatty acid oxidation (FAO) pathway genes in NanoString nCounter

756 Human Metabolic Pathways probe set. Genes with counts under 100 were eliminated from analysis.  
757 Coloring indicates relative expression of each gene, from low (blue) to high (red). Heatmap  
758 generated on Morpheus. **(D)** Purified rested and stimulated human iNKT cells and T<sub>CONV</sub> were  
759 stained for intracellular Cpt1a expression after 48 hours. Mean fluorescence intensity (MFI) of Cpt1a  
760 (left) and percentage of Cpt1a positive cells (right) for each cell type relative to isotype control  
761 indicated. Each symbol represents independent, matched healthy human donor sample. **(E)** Heatmap  
762 of n=8 independent, matched healthy human donor rested and stimulated iNKT and T<sub>CONV</sub> relative  
763 expression of AMPK pathway genes in NanoString nCounter Human Metabolic Pathways probe set  
764 analyzed as in (C). For all graphs, asterisks indicate statistical significance (\* p<0.05, \*\* p<0.01,  
765 \*\*\*p<0.001).

766 **Figure 5: Stimulated human iNKT cells oxidize fatty acids more than stimulated T<sub>CONV</sub>.** **(A-B)**  
767 Real-time measurements of oxygen consumption rate (OCR) of 48-hour stimulated iNKT cells (A)  
768 and stimulated T<sub>CONV</sub> (B) from matched human donors were obtained on a Seahorse Bioanalyzer.  
769 OCR was measured after sequential additions of media (vehicle, black) or 4μM etomoxir (red)  
770 followed by 1.5μM oligomycin A, 0.5μM FCCP, and 0.5μM rotenone and antimycin A. Graphs  
771 depict representative example of 3 independent, matched human donor replicates. **(C)** Summary data  
772 displaying the percent change in maximal OCR upon FCCP (mitochondrial uncoupler) injection with  
773 pre-injection of etomoxir relative to vehicle controls for stimulated iNKT cells (dark grey) and  
774 stimulated T<sub>CONV</sub> (light grey). Graphs depict summary data from 3 independent matched human  
775 donors. Asterisks indicate statistical significance (\* p<0.05, \*\* p<0.01). **(D)** Summary data  
776 displaying the percent change in ATP production with etomoxir addition relative to vehicle controls  
777 for stimulated iNKT cells (dark grey) and stimulated T<sub>CONV</sub> (light grey). Graphs depict summary data  
778 from 3 independent matched human donors. Asterisks indicate statistical significance (\* p<0.05, \*\*  
779 p<0.01).

## 780 **TABLES**

781 **Table 1: Glycolysis pathway gene set expression in stimulated iNKT cells and T<sub>CONV</sub>.**

| Gene name | p-value    | q-value    | Higher expressing cell subset |
|-----------|------------|------------|-------------------------------|
| PFKL      | 1.8003E-05 | 1.6498E-04 | iNKT                          |
| PFKM      | 2.7224E-05 | 1.6498E-04 | T <sub>CONV</sub>             |
| HK2       | 7.0098E-05 | 2.8319E-04 | T <sub>CONV</sub>             |
| LDHA      | 1.2875E-04 | 3.9011E-04 | T <sub>CONV</sub>             |
| LDHB      | 2.0950E-04 | 4.2319E-04 | T <sub>CONV</sub>             |

|       |            |            |                   |
|-------|------------|------------|-------------------|
| ALDOA | 6.6621E-03 | 1.0093E-02 | T <sub>CONV</sub> |
| ENO1  | 1.8666E-02 | 2.1844E-02 | T <sub>CONV</sub> |
| GAPDH | 1.9826E-02 | 2.1844E-02 | T <sub>CONV</sub> |
| PDHA1 | 2.7659E-02 | 2.7936E-02 | T <sub>CONV</sub> |
| PGM2  | 7.5981E-02 | 6.5778E-02 | T <sub>CONV</sub> |
| HK1   | 1.2941E-01 | 1.0457E-01 | iNKT              |
| PKM   | 2.0838E-01 | 1.5785E-01 | iNKT              |
| PGK1  | 9.5339E-01 | 6.0816E-01 | iNKT              |

782

**Figure 1****A.**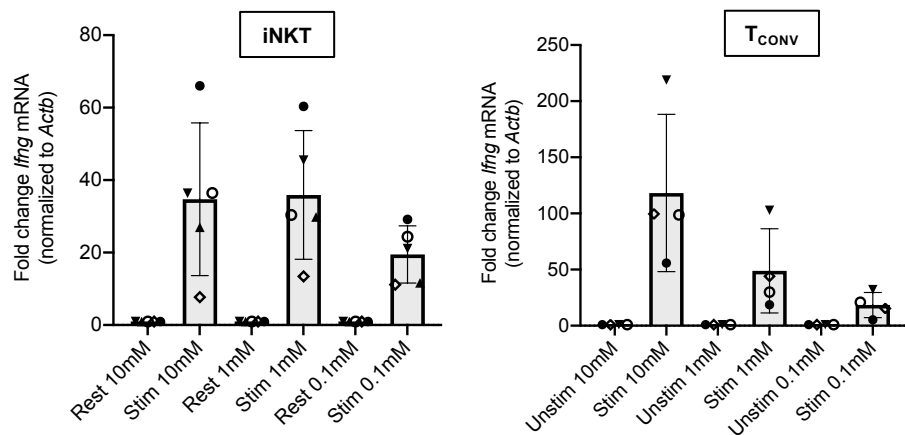**B.**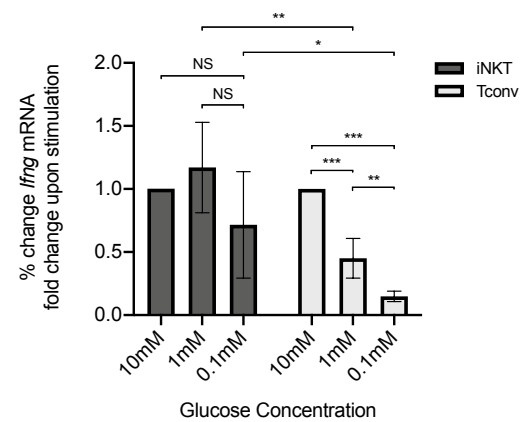**C.**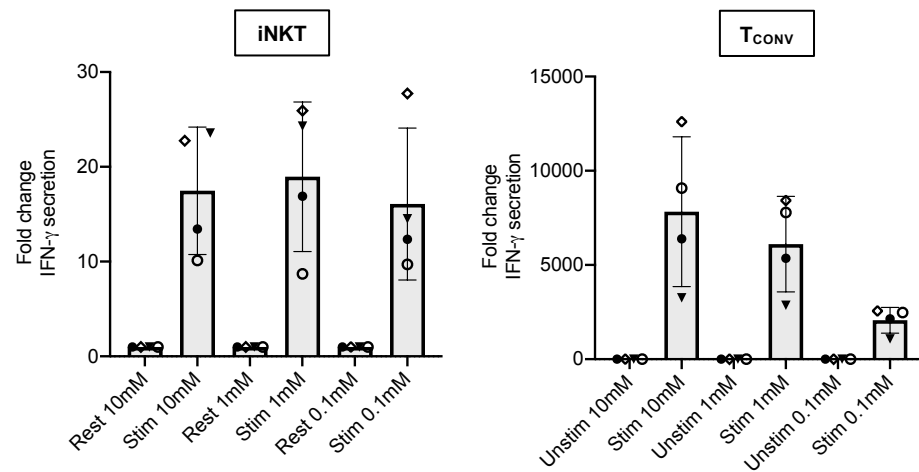**D.**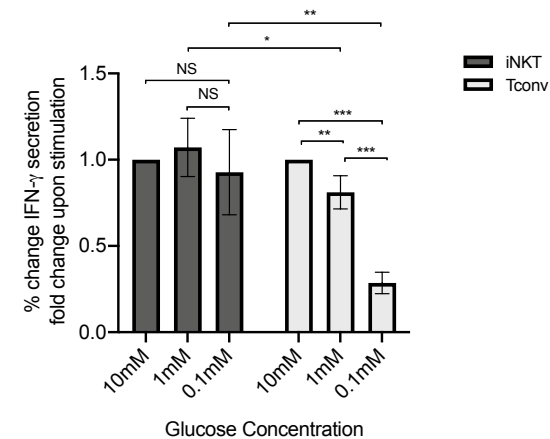**E.**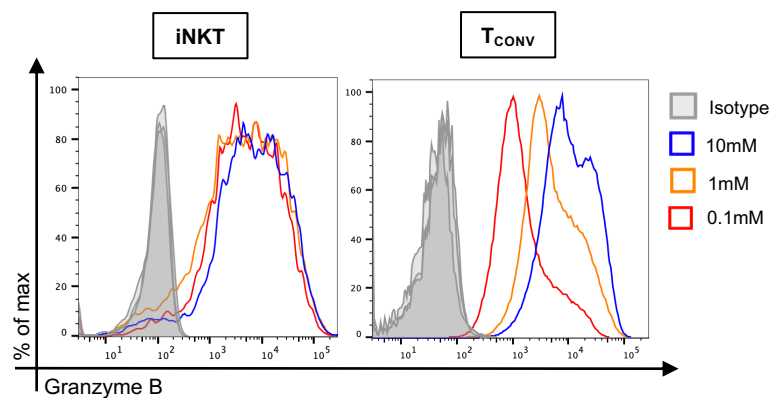**F.**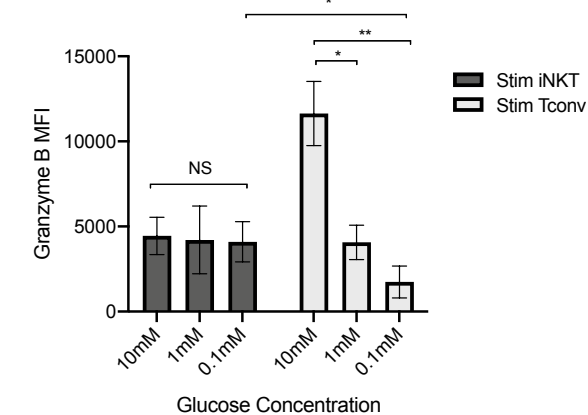

Figure 2

A.

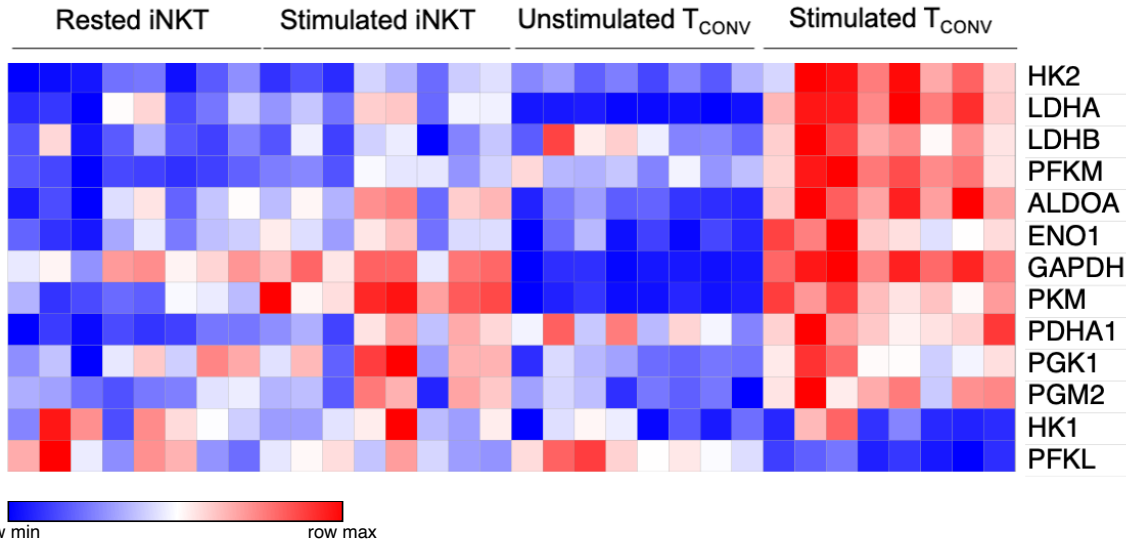

B.

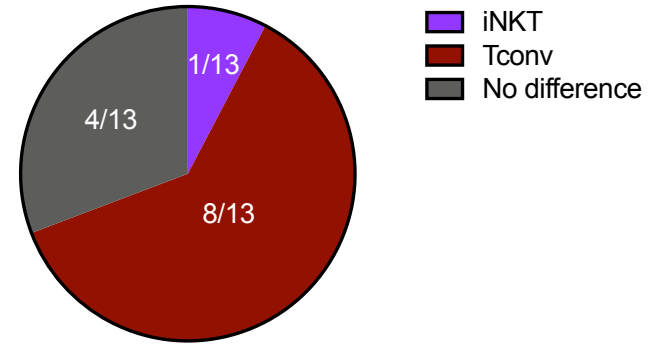

**Figure 3**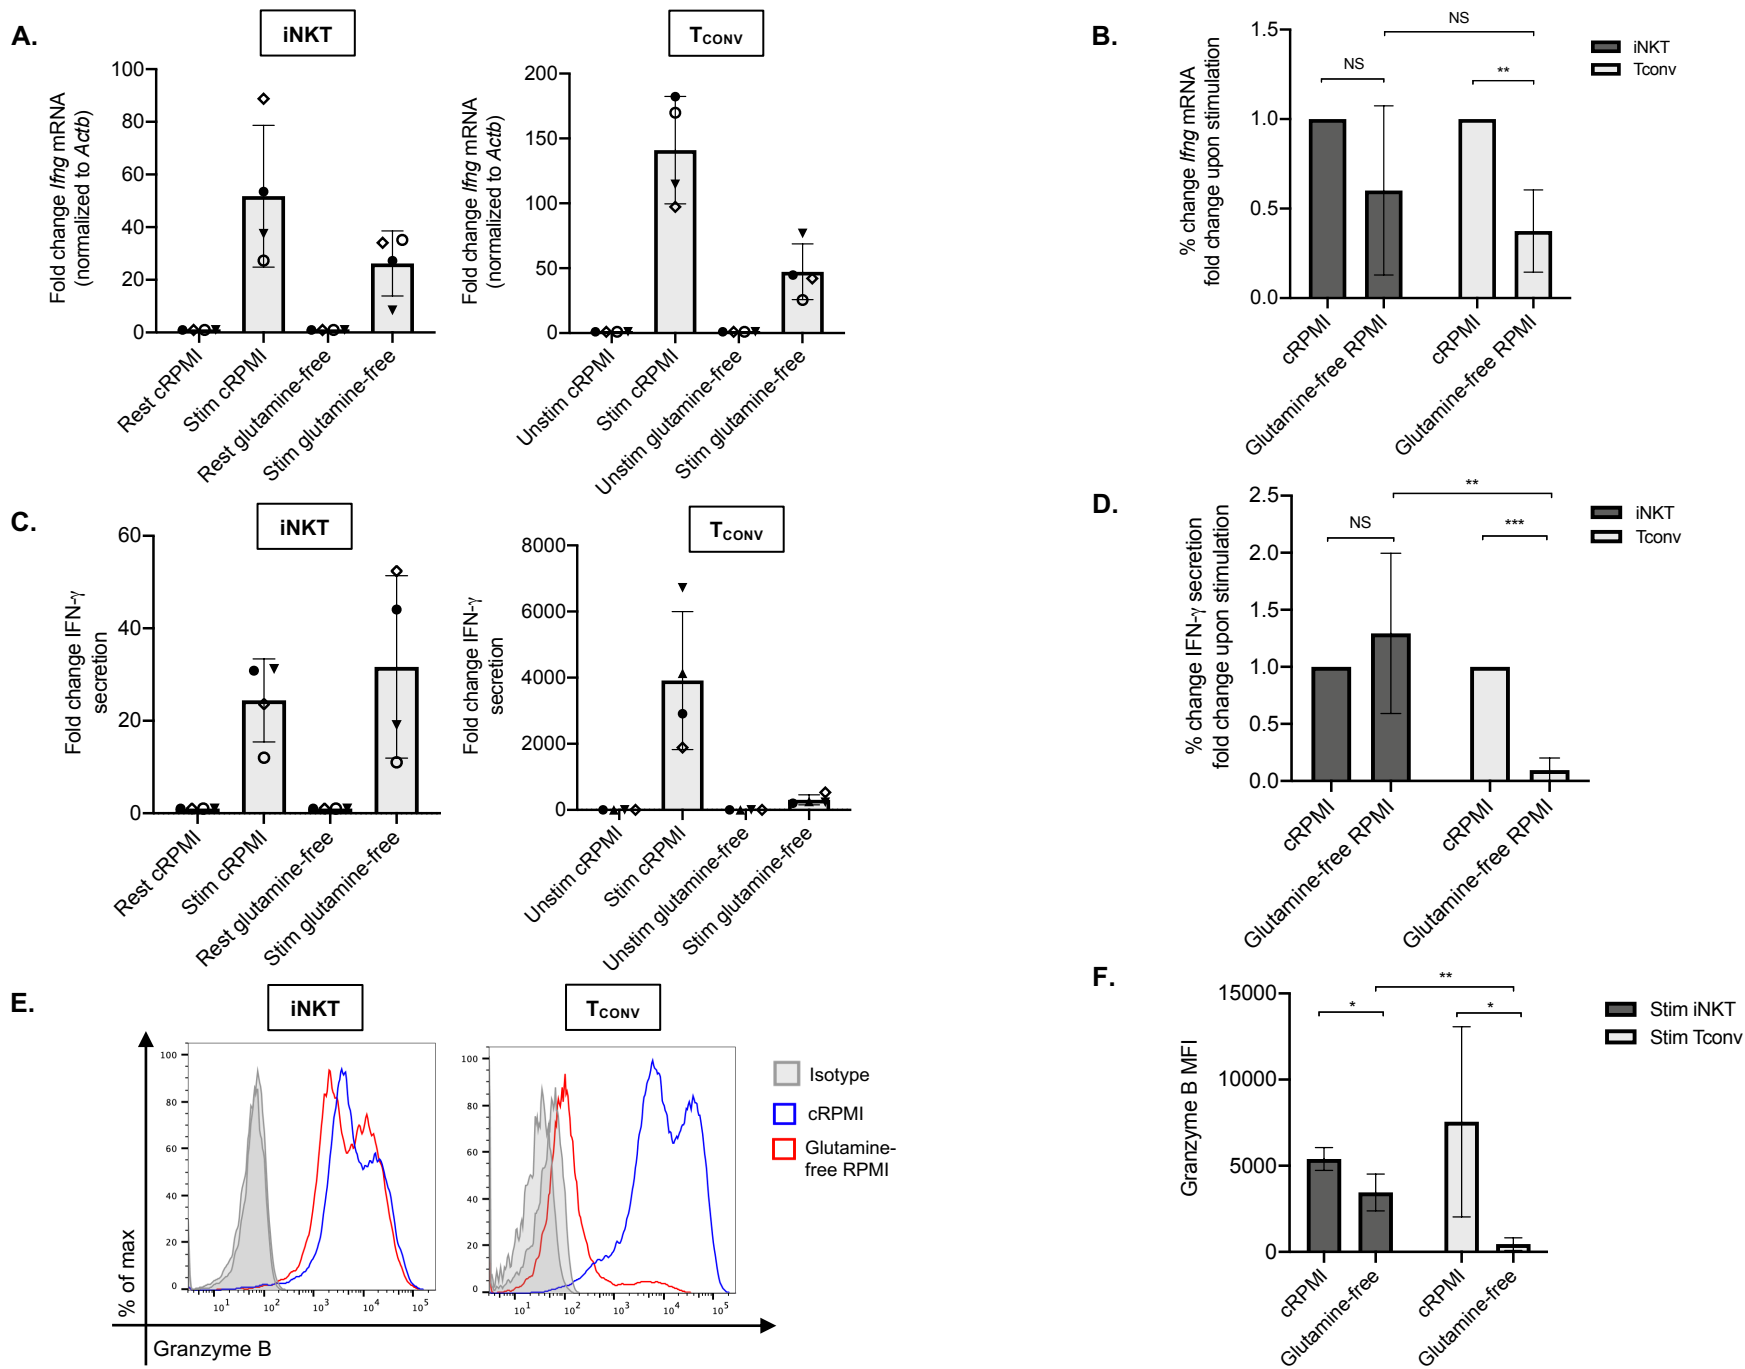

**Figure 4**

**A.**

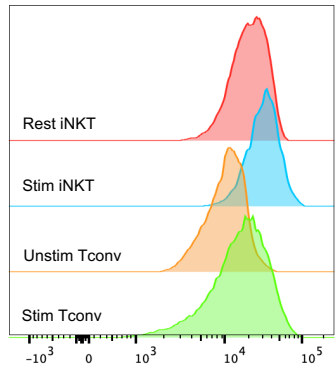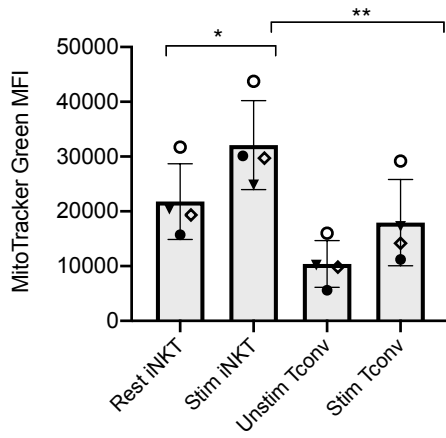

**D.**

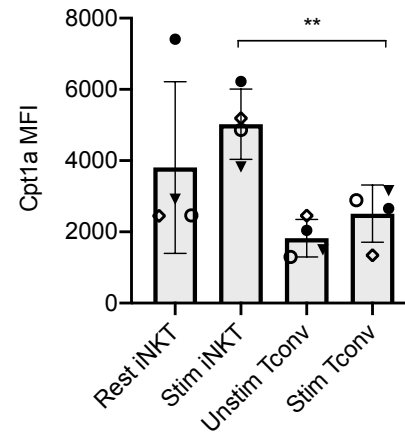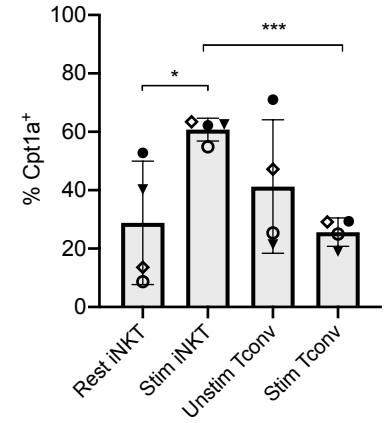

**B.**

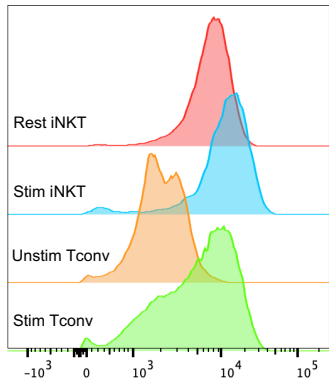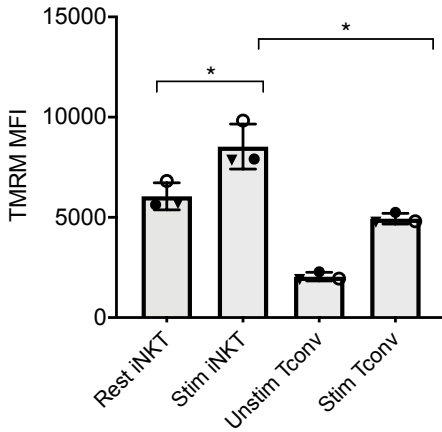

**E.**

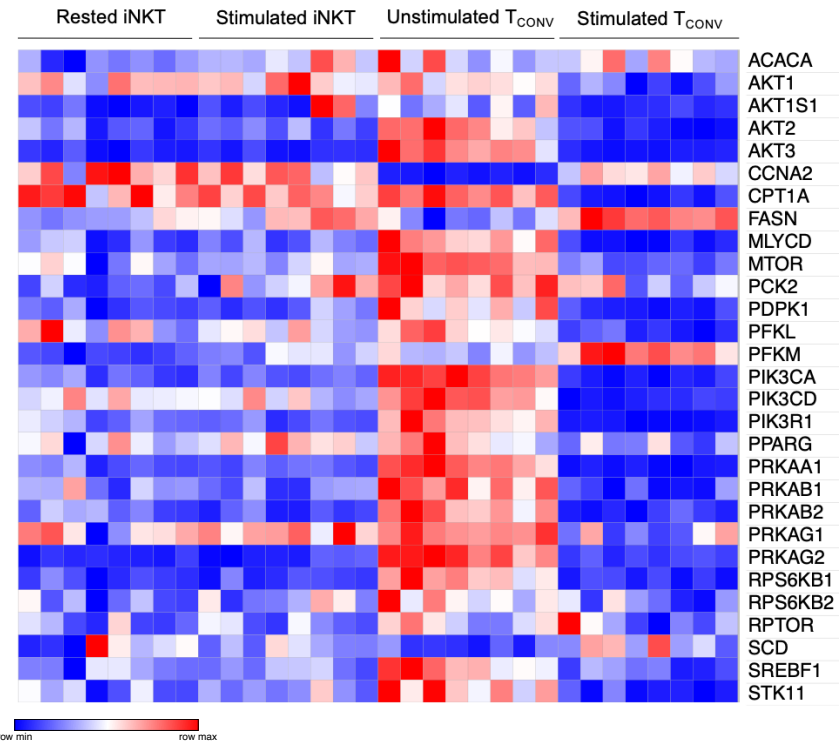

**C.**

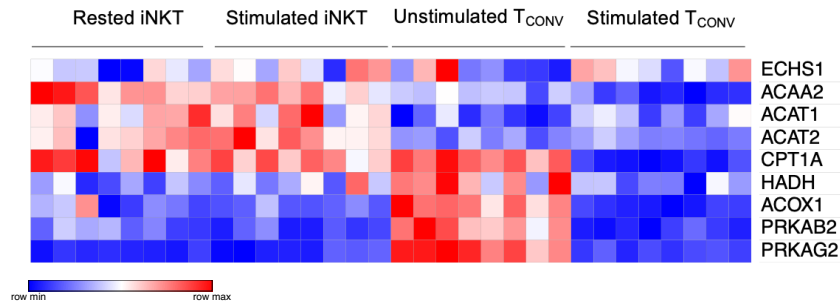



**Figure 5**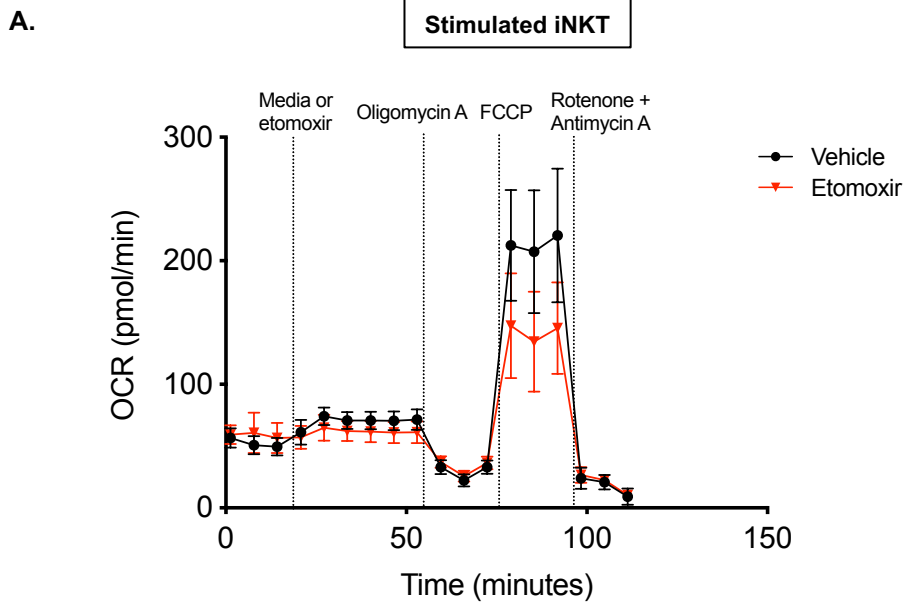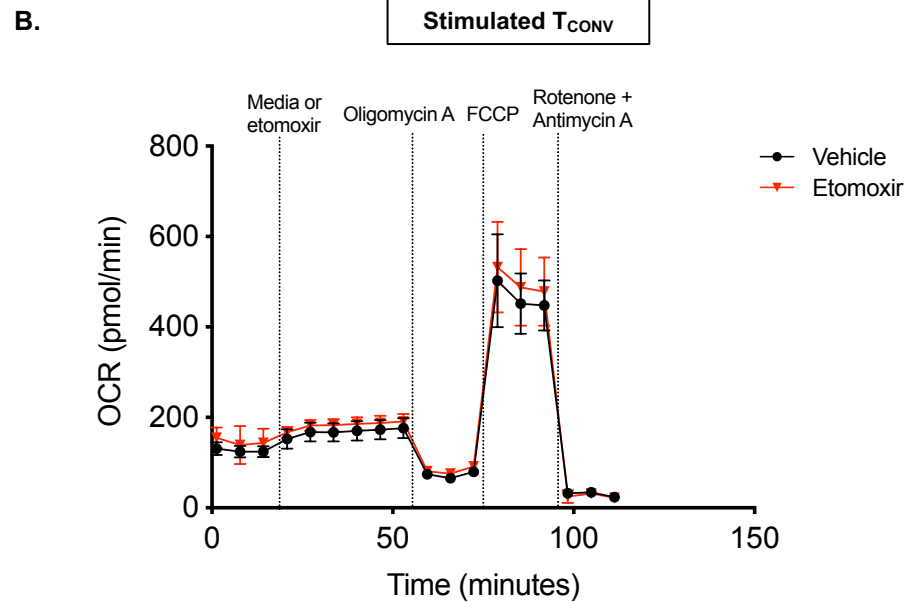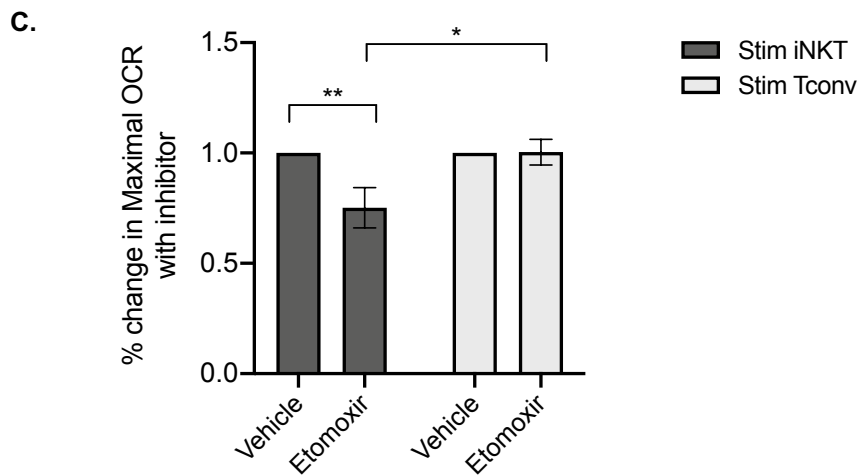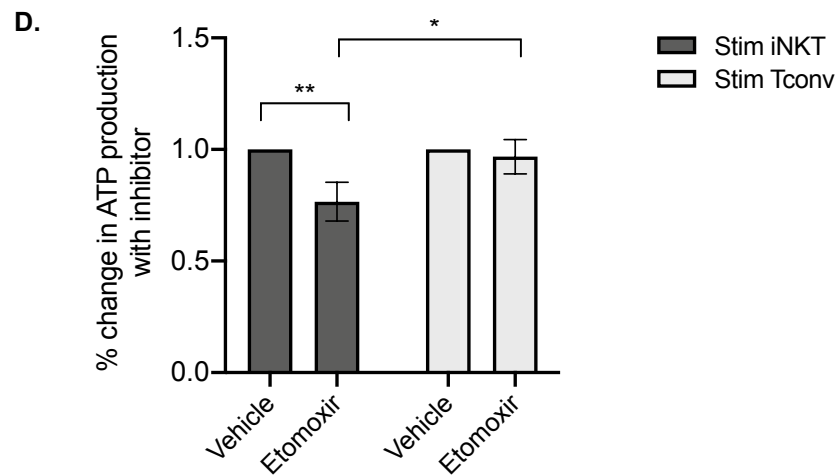

Source: https://www.biorxiv.org/content/10.1101/2021.04.29.442021v1.full.pdf
